# Supplementary material for: Near-Infrared Absorbing Molecule Based on Triphenylamine Radical Cation with Extended Homoaryl π-System
Source: MDPI journal article supplement (doi:10.3390/colorants1020014), 2022-06-02
Supplement: s1 [file s1]

## **Supplementary Materials:**

### **Near-Infrared Absorbing Molecule Based on Triphenylamine Radical Cation with Extended Homoaryl $\pi$ -System**

**Masafumi Yano, Kohei Tamada, Misaki Nakai, Koichi Mitsudo and Yukiyasu Kashiwagi**

#### **Contents**

1. General
2. Synthesis of **2–5**
3. DFT Calculations
4. Solubility test
5. Cyclic voltammetry
6. Absorption and fluorescence spectra of the neutral or oxidized species
7. Reduction of the radical cation **4<sup>•+</sup>** with ascorbic acid.
8. Fluorescence spectra
9. <sup>1</sup>H and <sup>13</sup>C spectra
10. ESR spectra
11. References

## 1. General

$^1\text{H}$  and  $^{13}\text{C}$  NMR spectra were recorded on JEOL JNM-ECZ600R or JEOL JNM-GSX400 spectrometers. Chemical shifts are reported in parts per million (ppm,  $\delta$  scale) from residual protons in the deuterated solvent for  $^1\text{H}$  NMR ( $\delta$  7.26 ppm for chloroform) and from the solvent carbon for  $^{13}\text{C}$  NMR ( $\delta$  77.16 ppm for deuterated chloroform). Fluorescence spectra were recorded on JASCO FP-8600 Fluorescence Spectrometer. UV-vis-NIR absorption spectra were recorded on V-670 UV-Vis-NIR Spectrophotometer. Analytic thin layer chromatography (TLC) was performed on Merck, pre-coated plate silica gel 60 F<sub>254</sub> (0.25 mm thickness). Unless otherwise noted, all materials were obtained from commercial suppliers and used without further purification. All reactions were performed under nitrogen atmosphere.

## 2. Synthesis of 2–5

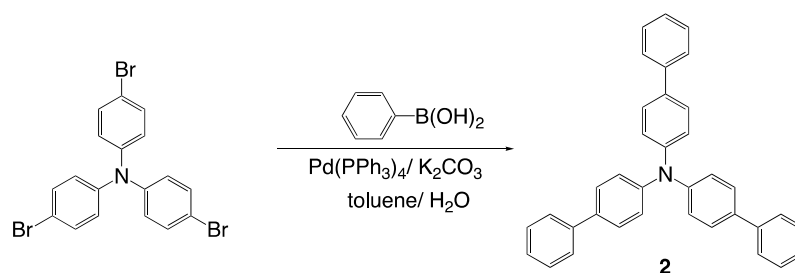

### Tri([1,1'-biphenyl]-4-yl)amine (2)

A mixture of 4, 4', 4''-tribromotriphenylamine (521 mg, 1.05 mmol), phenylboronic acid (1.32 g, 10.6 mmol), tetrakis(triphenylphosphine)palladium(0) (79 mg, 0.063 mmol),  $\text{K}_2\text{CO}_3$  (2.02 g, 5.62 mmol) in toluene (10.4 mL) and water (2.5 mL) was purged with nitrogen and stirred for 10 minutes, then heated at 90 °C under nitrogen for 24 h. After cooling to room temperature,  $\text{H}_2\text{O}$  (30 mL) was added to the resulting mixture, and the mixture was extracted with ethyl acetate ( $3 \times 20$  mL). The combined organic phase was dried over  $\text{Na}_2\text{SO}_4$  and the solvent was evaporated in vacuo. The residue was purified by column chromatography on silica gel (eluted with *n*-hexane/ chloroform = 7/3) to give the pure product as a white solid (316 mg, 62%). The  $^1\text{H}$  and  $^{13}\text{C}$  NMR spectra were consistent with those in the literature [1].

$^1\text{H}$  NMR (400MHz,  $\text{CDCl}_3$ ):  $\delta$  7.23 (d, 6H,  $J$  = 8.8 Hz), 7.31 (t, 3H,  $J$  = 7.6 Hz), 7.42 (t, 6H,  $J$  = 7.6 Hz), 7.52 (d, 6H,  $J$  = 8.8 Hz), 7.59 (d, 6H,  $J$  = 7.6 Hz)

$^{13}\text{C}$  NMR (100MHz,  $\text{CDCl}_3$ ):  $\delta$  124.51, 126.77, 126.96, 127.82, 128.82, 135.79, 140.72,

146.97

HRMS(DART): m/z: Calcd. for C<sub>36</sub>H<sub>27</sub>N [M]<sup>+</sup>: 473.2144; Found: 473.2130

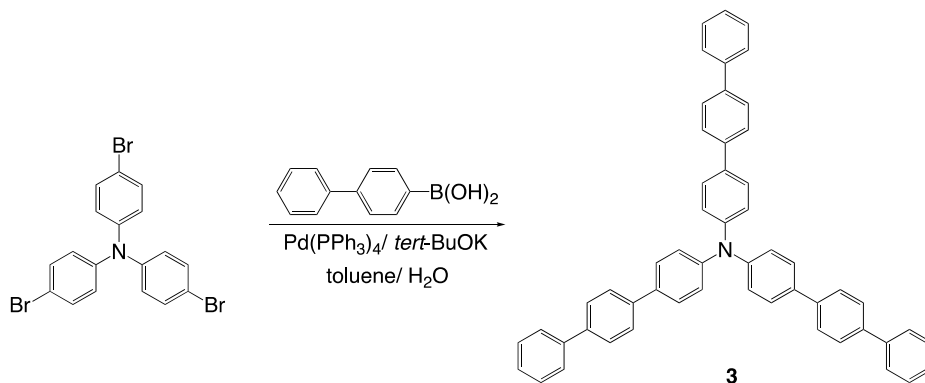

### Tri([1,1':4',1''-terphenyl]-4-yl)amine (3)

A mixture of 4, 4', 4''-tribromotriphenylamine (157 mg, 0.33 mmol), 4-biphenylboronic acid (241 mg, 1.22 mmol), tetrakis(triphenylphosphine)palladium(0) (17 mg, 0.014 mmol), potassium *tert*-butoxide (132 mg, 5.62 mmol) in toluene (2.1 mL) and water (1.2 mL) was purged with nitrogen and stirred for 10 minutes, then heated at 90 °C under nitrogen for 24 h. After cooling to room temperature, H<sub>2</sub>O (30 mL) was added to the resulting mixture, and the mixture was extracted with chloroform (3 × 20 mL). The combined organic phase was dried over Na<sub>2</sub>SO<sub>4</sub> and the solvent was evaporated in vacuo. The obtained solid was purified by recrystallization from ethanol to afford a white solid (108 mg, 47%). The <sup>1</sup>H and <sup>13</sup>C NMR spectra were consistent with those in the literature [1].

<sup>1</sup>H NMR (400MHz, CDCl<sub>3</sub>): δ 7.27 (d, *J* = 8.4 Hz, 6H), 7.35 (t, *J* = 7.6 Hz, 3H), 7.46 (t, *J* = 7.6 Hz, 6H), 7.58 (d, *J* = 8.4 Hz, 6H), 7.64 - 7.72 (m, 18H)

<sup>13</sup>C NMR (100MHz, CDCl<sub>3</sub>): δ 124.58, 127.05, 127.08, 127.33, 127.55, 127.89, 128.85, 135.28, 139.59, 139.85, 140.82, 146.99

HRMS(DART): m/z: Calcd. for C<sub>54</sub>H<sub>39</sub>N [M]<sup>+</sup>: 701.3083; Found: 701.3082

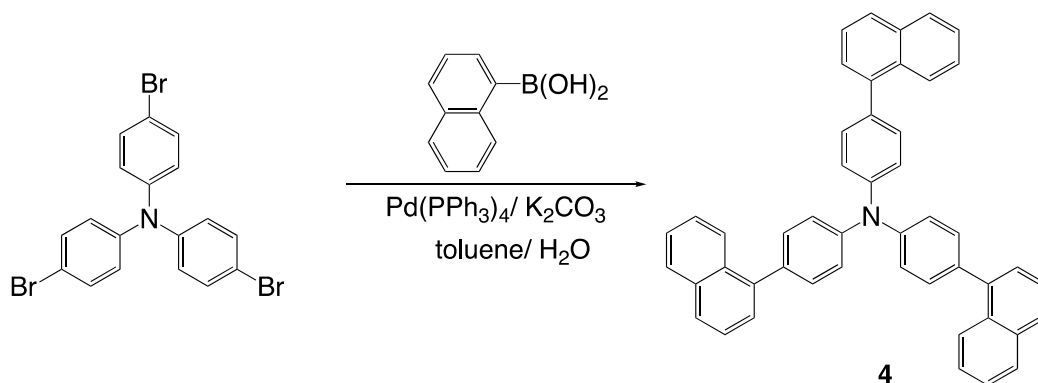

#### Tris(4-(naphthalen-1-yl)phenyl)amine (**4**)

A mixture of 4, 4', 4''-tribromotriphenylamine (2.00 g, 4.15 mmol), 1-naphthylboronic acid (3.57 g, 20.7 mmol), tetrakis(triphenylphosphine)palladium(0) (240 mg, 0.21 mmol), K<sub>2</sub>CO<sub>3</sub> (2.87 g, 20.7 mmol) in toluene (42 mL) and water (10.4 mL) was purged with nitrogen and stirred for 10 minutes, then heated at 90 °C under nitrogen for 24 h. After cooling to room temperature, H<sub>2</sub>O (30 mL) was added to the resulting mixture, and the mixture was extracted with ethyl acetate (3 × 20 mL). The combined organic phase was dried over Na<sub>2</sub>SO<sub>4</sub> and the solvent was evaporated in vacuo. The residue was redissolved in small amount of ethyl acetate. Addition of large amount of methanol gave the pure product as a yellow powder (845 mg, 33%). The <sup>1</sup>H and <sup>13</sup>C NMR spectra were consistent with those in the literature [2].

<sup>1</sup>H NMR (400MHz, CDCl<sub>3</sub>): δ 7.40 (d, 6H, *J* = 8.0 Hz), 7.45 - 7.55 (m, 18H), 7.85 (d, 3H, *J* = 8.0 Hz), 7.91 (d, 3H, *J* = 8.8 Hz), 8.07 (d, 3H, *J* = 8.8 Hz)

<sup>13</sup>C NMR (100MHz, CDCl<sub>3</sub>): δ 124.11, 125.56, 125.87, 126.09, 126.19, 127.03, 127.57, 128.43, 131.14, 131.77, 133.99, 135.34, 139.99, 146.97

HRMS(DART): *m/z*: Calcd. for C<sub>48</sub>H<sub>34</sub>N [M]<sup>+</sup>: 623.2613; Found: 623.2613

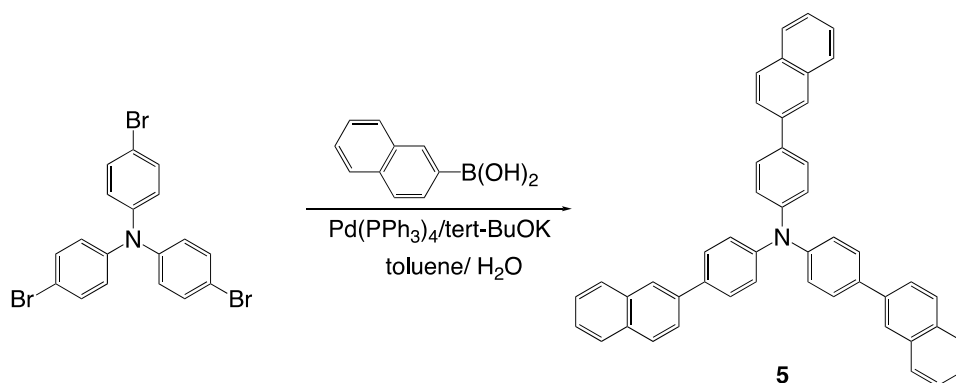

### Tris(4-(naphthalen-1-yl)phenyl)amine (5)

A mixture of 4, 4', 4''-tribromotriphenylamine (221 mg, 0.46 mmol), 2-naphthylboronic acid (373 mg, 20.7 mmol), tetrakis(triphenylphosphine)palladium(0) (30 mg, 0.026 mmol), potassium *tert*-butoxide (245 mg, 2.19 mmol) in toluene (4.2 mL) and water (0.9 mL) was purged with nitrogen and stirred for 10 minutes, then heated at 90 °C under nitrogen for 24 h. After cooling to room temperature, H<sub>2</sub>O (30 mL) was added to the resulting mixture, and the mixture was extracted with ethyl acetate (3 × 20 mL). The combined organic phase was dried over Na<sub>2</sub>SO<sub>4</sub> and the solvent was evaporated in vacuo. The residue was redissolved in small amount of ethyl acetate. Addition of large amount of methanol gave the pure product as a yellow powder (248 mg, 95%). The <sup>1</sup>H and <sup>13</sup>C NMR spectra were consistent with those in the literature [3].

<sup>1</sup>H NMR (400MHz, CDCl<sub>3</sub>): δ 7.32 (d, 6H, *J* = 8.8 Hz), δ7.44 - 7.52 (m, 6H), δ7.68 (d, 6H, *J* = 8.8 Hz), δ7.76 (dd, 3H, *J* = 8.8, 1.8 Hz), δ7.85 - 7.92 (m, 9H), δ8.04 (s, 3H)

<sup>13</sup>C NMR (100MHz, CDCl<sub>3</sub>): 124.67, 125.24, 125.36, 125.83, 126.34, 127.71, 128.19, 128.30, 128.49, 132.26, 133.89, 135.73, 138.03, 147.03

HRMS(DART): *m/z*: Calcd. for C<sub>48</sub>H<sub>34</sub>N [M]<sup>+</sup>: 623.2613; Found: 623.2589

### **3. DFT Calculations**

Density functional theory (DFT) calculations were performed using Gaussian 09 program [4]. Geometries were optimized at the (U)B3LYP/6-31G(d) level of theory [5–8] with the polarizable continuum model (PCM) [9] using dichloromethane as a solvent. TD-DFT calculations were carried out at the same level of theory. The data were summarized in Figures S1-S4.

|                                                                                                   |                                                                                     |                                                                                       |
|---------------------------------------------------------------------------------------------------|-------------------------------------------------------------------------------------|---------------------------------------------------------------------------------------|
| 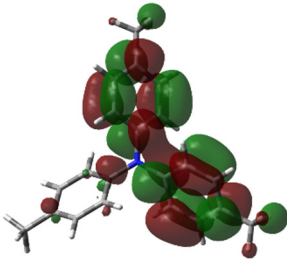                 |    |    |
| <b>LUMO+1</b><br>-0.25 eV (79)                                                                    | <b>LUMO+1</b><br>-1.03 eV (127)                                                     | <b>LUMO+1</b><br>-1.29 eV (187)                                                       |
|                  |    |    |
| <b>LUMO</b><br>-0.36 eV (78)                                                                      | <b>LUMO</b><br>-1.03 eV (126)                                                       | <b>LUMO</b><br>-1.30 eV (186)                                                         |
|                |  |  |
| <b>HOMO</b><br>-4.87 eV (77)                                                                      | <b>HOMO</b><br>-4.97 eV (125)                                                       | <b>HOMO</b><br>-4.95 eV (185)                                                         |
| Excited State 1: 3.8056 eV<br>(325.80 nm), f = 0.0184<br>77 → 78    0.69882                       | Excited State 1: 3.4168 eV<br>(362.87 nm), f = 0.7802<br>125 → 126    0.70281       | Excited State 1: 3.1792 eV<br>(389.98 nm), f = 1.1007<br>185 → 186    0.69857         |
| Excited State 2: 3.9986 eV<br>(310.07 nm), f = 0.3940<br>77 → 79    0.57469<br>77 → 80    0.40005 | Excited State 2: 3.4177 eV<br>(362.77 nm), f = 0.7856<br>125 → 127    0.70281       | Excited State 2: 3.1832 eV<br>(389.50 nm), f = 1.1093<br>185 → 187    0.69857         |
| <b>1</b>                                                                                          | <b>2</b>                                                                            | <b>3</b>                                                                              |

**Figure S1.** HOMO, LUMO, and LUMO+1 orbitals of **1–3** with calculated energy levels.

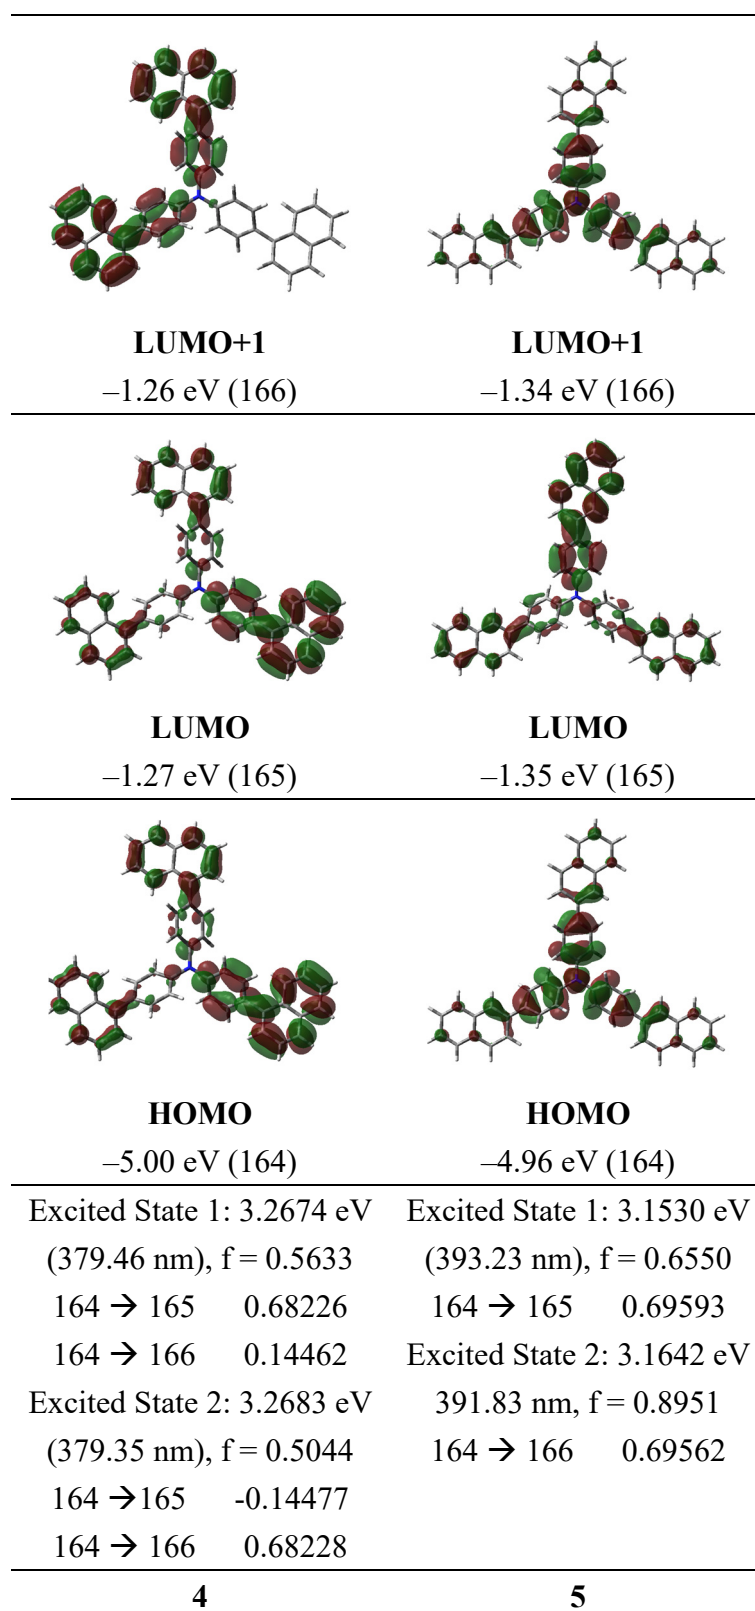

**Figure S2.** HOMO, LUMO, and LUMO+1 orbitals of **4** and **5** with calculated energy levels.



| $1^{\bullet+}$                                                                    | $2^{\bullet+}$                                                                    | $3^{\bullet+}$                                                                      |
|-----------------------------------------------------------------------------------|-----------------------------------------------------------------------------------|-------------------------------------------------------------------------------------|
| 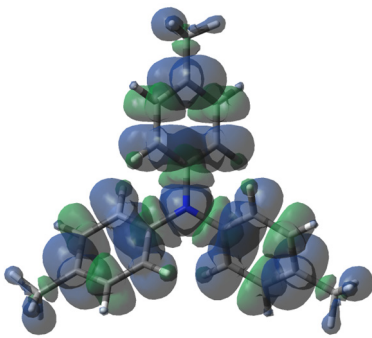 |  |  |
| <b>SOMO</b>                                                                       | <b>SOMO</b>                                                                       | <b>SOMO</b>                                                                         |
| -6.39 eV (77A)                                                                    | -6.12 eV (125A)                                                                   | -5.92 eV (185A)                                                                     |
| -4.79 eV (77B)                                                                    | -4.84 eV (125B)                                                                   | -4.80 eV (185B)                                                                     |
| Excited State 1: 1.9573 eV<br>(633.44 nm), f = 0.1138                             | Excited State 1: 1.4467 eV<br>(856.99 nm), f = 0.4062                             | Excited State 1: 1.1139 eV<br>(1113.10 nm), f = 0.5249                              |
| 73B $\rightarrow$ 77B -0.40966                                                    | 124B $\rightarrow$ 125B 0.99222                                                   | 184B $\rightarrow$ 185B 0.99230                                                     |
| 74B $\rightarrow$ 77B -0.12589                                                    | Excited State 2: 1.4480 eV                                                        | Excited State 2: 1.1148 eV                                                          |
| 75B $\rightarrow$ 77B 0.22839                                                     | (856.26 nm), f = 0.4078                                                           | (1112.16 nm), f = 0.5251                                                            |
| 76B $\rightarrow$ 77B 0.86567                                                     | 123B $\rightarrow$ 125B 0.99223                                                   | 183B $\rightarrow$ 185B 0.99228                                                     |
| Excited State 2: 1.9587 eV<br>(633.00 nm), f = 0.1138                             |                                                                                   |                                                                                     |
| 73B $\rightarrow$ 77B 0.12414                                                     |                                                                                   |                                                                                     |
| 74B $\rightarrow$ 77B -0.41373                                                    |                                                                                   |                                                                                     |
| 75B $\rightarrow$ 77B 0.86377                                                     |                                                                                   |                                                                                     |
| 76B $\rightarrow$ 77B -0.22927                                                    |                                                                                   |                                                                                     |

**Figure S3.** Spin density plots of cation radical of **1–3** with their calculated energy levels.

| $4^{+\bullet}$                                                                    | $5^{+\bullet}$                                                                     |
|-----------------------------------------------------------------------------------|------------------------------------------------------------------------------------|
| 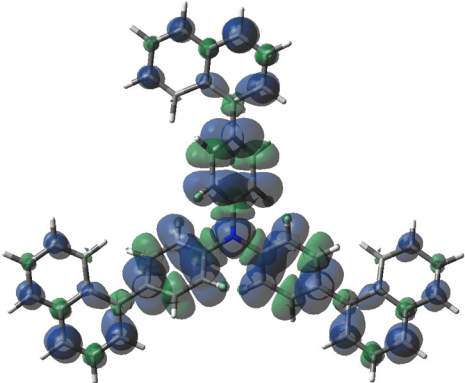 |  |
| <b>SOMO</b>                                                                       | <b>SOMO</b>                                                                        |
| –5.92 eV (164A)                                                                   | –5.92 eV (164A)                                                                    |
| –4.84 eV (164B)                                                                   | –4.80 eV (164B)                                                                    |
| Excited State 1: 0.9192 eV<br>(1348.85 nm), $f = 0.2587$                          | Excited State 1: 0.9971 eV<br>(1243.50 nm), $f = 0.2753$                           |
| 162B $\rightarrow$ 164B    0.97054                                                | 162B $\rightarrow$ 164B    0.14393                                                 |
| 163B $\rightarrow$ 164B    -0.23341                                               | 163B $\rightarrow$ 164B    0.98591                                                 |
| Excited State 2: 0.9207 eV<br>(1346.65 nm), $f = 0.3431$                          | Excited State 2: 1.0038 eV<br>(1235.15 nm), $f = 0.3494$                           |
| 162B $\rightarrow$ 164B    0.23342                                                | 162B $\rightarrow$ 164B    0.98594                                                 |
| 163B $\rightarrow$ 164B    0.97068                                                | 163B $\rightarrow$ 164B    -0.14394                                                |

**Figure S4.** Spin density plots of cation radical of **4** and **5** with their calculated energy levels.

## Computed Geometries

### Tri-*p*-tolylamine (1)

|   |                 |                 |                 |
|---|-----------------|-----------------|-----------------|
| N | -0.003179564332 | 0.000456811338  | -0.002071284648 |
| C | 1.309467083054  | -0.546155686887 | -0.027607740154 |
| C | -0.186621375309 | 1.409758417587  | 0.009733455123  |
| C | -1.131764151528 | -0.864575320862 | 0.008123851019  |
| C | -1.172746740129 | 2.000091144008  | 0.817020327720  |
| C | -1.353797366708 | 3.381408024754  | 0.816437141698  |
| C | -0.552329881823 | 4.227315404414  | 0.036612120245  |
| C | 0.432078957534  | 3.628426846140  | -0.761382210049 |
| C | 0.611343085807  | 2.246605290328  | -0.786693207160 |
| C | 1.614317211901  | -1.645229475399 | -0.845738460912 |
| C | 2.899340631279  | -2.184753538095 | -0.855498485038 |
| C | 3.929469418993  | -1.641613968089 | -0.075647321293 |
| C | 3.615394652320  | -0.540645215144 | 0.733904517118  |
| C | 2.330470262107  | -0.003474278694 | 0.769250271777  |
| C | -2.254582838323 | -0.591291006012 | -0.789257128721 |
| C | -3.358822307562 | -1.440702614027 | -0.769996952699 |
| C | -3.383728546231 | -2.595146477651 | 0.025111571169  |
| C | -2.252158301606 | -2.865437379785 | 0.807120151050  |
| C | -1.148033541007 | -2.015349961177 | 0.812074072011  |
| H | -1.799452049415 | 1.371932290816  | 1.442255622516  |
| H | -2.127531515944 | 3.811243039630  | 1.449003494116  |
| H | 1.063494532632  | 4.252843668679  | -1.389843784084 |
| H | 1.371097091129  | 1.810515385377  | -1.427791392381 |
| H | 0.839380424269  | -2.078849531055 | -1.470120324544 |
| H | 3.107197195233  | -3.039045150617 | -1.496229270558 |
| H | 4.387281039512  | -0.102234533472 | 1.362872323999  |
| H | 2.112178243509  | 0.838955386861  | 1.418207415399  |
| H | -2.256510630597 | 0.286674519377  | -1.427819201473 |
| H | -4.214020980550 | -1.207430883542 | -1.400754452790 |
| H | -2.236655031431 | -3.752236052249 | 1.437067291913  |
| H | -0.290368371394 | -2.244022182936 | 1.437067929188  |
| C | 5.331083498709  | -2.204493984061 | -0.122560428231 |
| H | 5.942937555774  | -1.694813623576 | -0.879365015143 |
| H | 5.842647781802  | -2.085128236476 | 0.838668009242  |

|   |                 |                 |                 |
|---|-----------------|-----------------|-----------------|
| H | 5.326962886666  | -3.270197681498 | -0.374805220091 |
| C | -4.594239774593 | -3.498942816130 | 0.057975536218  |
| H | -4.315602191723 | -4.533593005724 | 0.284621643858  |
| H | -5.311163991643 | -3.180985342102 | 0.827267819005  |
| H | -5.125653229270 | -3.492429157475 | -0.899841425602 |
| C | -0.726453797700 | 5.727669158145  | 0.075866557995  |
| H | -1.770536012361 | 6.005390421544  | 0.255959946302  |
| H | -0.128765872171 | 6.180075830026  | 0.879129453585  |
| H | -0.408305698876 | 6.192283633710  | -0.863573116694 |

**Radical cation of tri-*p*-tolylamine (1<sup>+</sup>)**

|   |                 |                 |                 |
|---|-----------------|-----------------|-----------------|
| N | -0.000603189451 | 0.001322860412  | 0.005814035847  |
| C | 1.162011499615  | -0.800288390756 | 0.004791093343  |
| C | 0.112175081183  | 1.408870061505  | 0.004269861214  |
| C | -1.276063387878 | -0.604405654863 | 0.007433113358  |
| C | -0.779499732150 | 2.191332759460  | 0.765777368030  |
| C | -0.654933922513 | 3.572378256087  | 0.763115305403  |
| C | 0.340330925721  | 4.217202093858  | 0.006553907512  |
| C | 1.221125359674  | 3.421055663765  | -0.748335517932 |
| C | 1.119462610171  | 2.038404745685  | -0.755224893976 |
| C | 1.201881488688  | -1.989079880744 | -0.752119359611 |
| C | 2.348917178373  | -2.767775609428 | -0.747188824134 |
| C | 3.480956202986  | -2.400998111170 | 0.003517751578  |
| C | 3.421408726065  | -1.215629370253 | 0.758487142873  |
| C | 2.287380131601  | -0.417597393804 | 0.762624449139  |
| C | -2.325307971702 | -0.049045797203 | -0.752978345051 |
| C | -3.572847606428 | -0.654111884916 | -0.745805358630 |
| C | -3.821062626213 | -1.813552597857 | 0.011266778189  |
| C | -2.765275424845 | -2.349111823025 | 0.771295460294  |
| C | -1.507498740291 | -1.765702463061 | 0.772497826837  |
| H | -1.533141262094 | 1.710342534385  | 1.379221947464  |
| H | -1.332195286626 | 4.165117040081  | 1.371069502495  |
| H | 1.990554771395  | 3.897383945257  | -1.349034539499 |
| H | 1.789651329380  | 1.442798662555  | -1.364847710916 |
| H | 0.349635461510  | -2.273400401890 | -1.359041995074 |

|   |                 |                 |                 |
|---|-----------------|-----------------|-----------------|
| H | 2.375149884150  | -3.673551276849 | -1.346019325759 |
| H | 4.274851227197  | -0.924027746554 | 1.363588622061  |
| H | 2.249159401711  | 0.476289352094  | 1.375055581748  |
| H | -2.145192434290 | 0.827611421611  | -1.365073145753 |
| H | -4.370121232000 | -0.228255621911 | -1.348055016594 |
| H | -2.939760037592 | -3.229831918009 | 1.382407856275  |
| H | -0.714344170121 | -2.175219804227 | 1.387932057710  |
| C | 4.729562373465  | -3.241217396955 | -0.021505511826 |
| H | 5.376108195368  | -2.942002260832 | -0.857462024191 |
| H | 5.310090069412  | -3.123488665834 | 0.898229530292  |
| H | 4.495611940393  | -4.301671152179 | -0.155719667174 |
| C | -5.171902757821 | -2.477082561880 | -0.011033796580 |
| H | -5.219481516975 | -3.221853086987 | -0.817007238837 |
| H | -5.375916854632 | -3.000748295553 | 0.927707115913  |
| H | -5.971787097141 | -1.752405414377 | -0.189982820834 |
| C | 0.445139192058  | 5.718571110774  | -0.015105083925 |
| H | -0.147909500147 | 6.132632844488  | -0.841659756710 |
| H | 0.065534221620  | 6.159637791778  | 0.911300462852  |
| H | 1.479045749173  | 6.045520407317  | -0.161455347419 |

**Tri([1,1'-biphenyl]-4-yl)amine (2)**

|   |                 |                 |                 |
|---|-----------------|-----------------|-----------------|
| N | 0.000000000000  | 0.000000000000  | 0.005359015073  |
| C | 0.000000000000  | -0.000000000001 | 1.425429525109  |
| C | 0.000652501401  | -1.229567476199 | -0.705431782201 |
| C | -0.000652501401 | 1.229567476200  | -0.705431782199 |
| C | 0.798521683975  | -1.397689437646 | -1.848936784570 |
| C | 0.789160980935  | -2.600450279969 | -2.547445884787 |
| C | 0.000800572475  | -3.688085845947 | -2.130797995535 |
| C | -0.787103470148 | -3.509495494376 | -0.979572561579 |
| C | -0.796434508321 | -2.305735583605 | -0.282482660201 |
| C | -0.795706810418 | 0.907117293380  | 2.144210052172  |
| C | -0.785981240089 | 0.908222995542  | 3.535114076321  |
| C | 0.000000000000  | -0.000000000003 | 4.266716439479  |
| C | 0.785981240089  | -0.908222995548 | 3.535114076320  |
| C | 0.795706810418  | -0.907117293383 | 2.144210052171  |
| C | -0.798521683975 | 1.397689437649  | -1.848936784568 |

|   |                 |                 |                 |
|---|-----------------|-----------------|-----------------|
| C | -0.789160980935 | 2.600450279973  | -2.547445884782 |
| C | -0.000800572475 | 3.688085845950  | -2.130797995529 |
| C | 0.787103470148  | 3.509495494377  | -0.979572561574 |
| C | 0.796434508321  | 2.305735583605  | -0.282482660197 |
| H | 1.435902974831  | -0.584865214172 | -2.182080771891 |
| H | 1.437973839592  | -2.707806725208 | -3.412063689408 |
| H | -1.436206786061 | -4.312978278805 | -0.643149790051 |
| H | -1.433579660168 | -2.190998261713 | 0.588612434037  |
| H | -1.431495522840 | 1.604173916970  | 1.607776269252  |
| H | -1.432550068112 | 1.603950585274  | 4.062327757158  |
| H | 1.432550068112  | -1.603950585280 | 4.062327757156  |
| H | 1.431495522840  | -1.604173916972 | 1.607776269249  |
| H | -1.435902974831 | 0.584865214176  | -2.182080771890 |
| H | -1.437973839592 | 2.707806725213  | -3.412063689403 |
| H | 1.436206786061  | 4.312978278806  | -0.643149790045 |
| H | 1.433579660168  | 2.190998261712  | 0.588612434040  |
| C | -0.000627775714 | 4.971251136523  | -2.876148629642 |
| C | 0.127925304235  | 6.200350988269  | -2.203918737282 |
| C | -0.129807494499 | 4.995551924181  | -4.276898588696 |
| C | 0.129479898048  | 7.406240604941  | -2.904648900836 |
| H | 0.202501523861  | 6.212603390873  | -1.120173852539 |
| C | -0.132425359959 | 6.201377968775  | -4.977687513240 |
| H | -0.204410924571 | 4.059923320763  | -4.824017055582 |
| C | -0.001820738635 | 7.413303254441  | -4.295366164514 |
| H | 0.223588554070  | 8.342697262998  | -2.361098950217 |
| H | -0.226951581520 | 6.192722694677  | -6.060388034362 |
| H | -0.002311637927 | 8.352729020802  | -4.841275474055 |
| C | 0.000000000000  | -0.000000000005 | 5.750603753600  |
| C | 0.125980504298  | -1.199228093638 | 6.475360297773  |
| C | -0.125980504298 | 1.199228093628  | 6.475360297775  |
| C | 0.127883970988  | -1.199251550464 | 7.870028246649  |
| H | 0.198577520870  | -2.142445431385 | 5.941147895484  |
| C | -0.127883970988 | 1.199251550452  | 7.870028246651  |
| H | -0.198577520870 | 2.142445431376  | 5.941147895487  |
| C | 0.000000000000  | -0.000000000007 | 8.574914840878  |
| H | 0.219875304517  | -2.139895597014 | 8.406659881500  |

|   |                 |                 |                 |
|---|-----------------|-----------------|-----------------|
| H | -0.219875304517 | 2.139895597001  | 8.406659881503  |
| H | 0.000000000000  | -0.000000000000 | 9.661436249002  |
| C | 0.000627775714  | -4.971251136519 | -2.876148629649 |
| C | -0.127925304235 | -6.200350988266 | -2.203918737292 |
| C | 0.129807494499  | -4.995551924174 | -4.276898588704 |
| C | -0.129479898048 | -7.406240604937 | -2.904648900848 |
| H | -0.202501523861 | -6.212603390871 | -1.120173852549 |
| C | 0.132425359959  | -6.201377968767 | -4.977687513250 |
| H | 0.204410924571  | -4.059923320755 | -4.824017055588 |
| C | 0.001820738635  | -7.413303254434 | -4.295366164525 |
| H | -0.223588554070 | -8.342697262995 | -2.361098950230 |
| H | 0.226951581520  | -6.192722694668 | -6.060388034371 |
| H | 0.002311637927  | -8.352729020794 | -4.841275474068 |

**Radical cation of tri([1,1'-biphenyl]-4-yl)amine (2<sup>•+</sup>)**

|   |                 |                 |                 |
|---|-----------------|-----------------|-----------------|
| N | 0.007998400943  | 0.018820075636  | 0.027315649667  |
| C | -0.009357546902 | 1.429733139394  | 0.032529375053  |
| C | -1.204363160055 | -0.702798679844 | 0.019679202101  |
| C | 1.237744457111  | -0.672794923777 | 0.029729796233  |
| C | -1.329038881528 | -1.889492437427 | 0.770271708984  |
| C | -2.520825910792 | -2.593532097079 | 0.756595070404  |
| C | -3.627895012163 | -2.156549297511 | -0.003355389854 |
| C | -3.482866414987 | -0.965842149596 | -0.748730148699 |
| C | -2.300408209852 | -0.245598682014 | -0.739727666724 |
| C | 0.937068613688  | 2.155066592334  | -0.719497436303 |
| C | 0.910644493112  | 3.539245127084  | -0.711824820749 |
| C | -0.044111962412 | 4.255015820924  | 0.042969598775  |
| C | -0.980904112261 | 3.510418358169  | 0.792367542267  |
| C | -0.973270995697 | 2.125989771889  | 0.789809366428  |
| C | 1.391504964842  | -1.850483984980 | -0.729599778184 |
| C | 2.600250846755  | -2.525076420987 | -0.721017577624 |
| C | 3.696304970899  | -2.066621218282 | 0.042241780938  |
| C | 3.522098548874  | -0.885382182668 | 0.796381556103  |
| C | 2.322280505793  | -0.194396349354 | 0.792593968100  |
| H | -0.505898917713 | -2.225051128999 | 1.391202588406  |
| H | -2.610931408105 | -3.477476920187 | 1.378557120262  |

|   |                 |                 |                 |
|---|-----------------|-----------------|-----------------|
| H | -4.296608117401 | -0.622853837326 | -1.378664186922 |
| H | -2.200189896917 | 0.644139217974  | -1.351289310276 |
| H | 1.655105976468  | 1.627772767235  | -1.337649058225 |
| H | 1.616400493928  | 4.078216685235  | -1.334539329822 |
| H | -1.699647779928 | 4.027250204838  | 1.418983545454  |
| H | -1.678064327064 | 1.576639606901  | 1.403982482341  |
| H | 0.576811832404  | -2.201591607760 | -1.353068085096 |
| H | 2.712016151058  | -3.401917290162 | -1.349486231821 |
| H | 4.327214325496  | -0.527145099652 | 1.428906821765  |
| H | 2.200262000245  | 0.688063778993  | 1.410704387820  |
| C | 4.979362025682  | -2.798548879688 | 0.051101974481  |
| C | 6.200285726040  | -2.114770457442 | 0.209976728206  |
| C | 5.012477984580  | -4.198620855777 | -0.099461457780 |
| C | 7.409556218377  | -2.806003822205 | 0.214830357414  |
| H | 6.205508266695  | -1.032723155058 | 0.298978417510  |
| C | 6.222371856124  | -4.888629837375 | -0.087886948052 |
| H | 4.084342026970  | -4.753944911660 | -0.195442169331 |
| C | 7.425853361985  | -4.195561569682 | 0.067554976990  |
| H | 8.340831585197  | -2.258338110749 | 0.326966122845  |
| H | 6.225268696380  | -5.969626190983 | -0.193757988524 |
| H | 8.369083860079  | -4.734117519342 | 0.073956216098  |
| C | -0.062281015735 | 5.732028480696  | 0.048427580982  |
| C | -1.272311630139 | 6.438501173746  | 0.191397862016  |
| C | 1.129992378905  | 6.469089356929  | -0.089208432612 |
| C | -1.288649301939 | 7.831289459036  | 0.192970609929  |
| H | -2.209051652538 | 5.895073302298  | 0.270694406527  |
| C | 1.112064634209  | 7.861831669111  | -0.080487852070 |
| H | 2.079809188386  | 5.949468993227  | -0.172433242948 |
| C | -0.096929796158 | 8.548723793435  | 0.058836071932  |
| H | -2.233677336090 | 8.357409786606  | 0.292532666924  |
| H | 2.043855956735  | 8.411760285658  | -0.176073601919 |
| H | -0.110289841275 | 9.634798858640  | 0.062849428448  |
| C | -4.892560400318 | -2.919731147900 | -0.017740438624 |
| C | -6.129948941544 | -2.265037060267 | -0.171669155431 |
| C | -4.891213155859 | -4.321268410986 | 0.122470250022  |
| C | -7.321850743748 | -2.985752615186 | -0.181740337807 |



|   |                 |                 |                 |
|---|-----------------|-----------------|-----------------|
| H | -6.161794598373 | -1.182817522016 | -0.252673262703 |
| C | -6.083768877393 | -5.040725657836 | 0.105687361377  |
| H | -3.949689248493 | -4.854287865678 | 0.214429222507  |
| C | -7.303948705028 | -4.376341106151 | -0.044738389099 |
| H | -8.266326195996 | -2.460346827483 | -0.289910798599 |
| H | -6.060064462875 | -6.122218971144 | 0.203567386980  |
| H | -8.233646771158 | -4.937874025954 | -0.055204769719 |

**Tri([1,1':4',1''-terphenyl]-4-yl)amine (3)**

|   |                 |                 |                 |
|---|-----------------|-----------------|-----------------|
| N | -0.009653739937 | -0.021182386137 | 0.011054839677  |
| C | -0.006236582125 | -0.013514760822 | -1.410092131317 |
| C | 0.395236206777  | 1.144893755346  | 0.717219454465  |
| C | -0.408397574753 | -1.185246603190 | 0.723592496048  |
| C | 1.253260001189  | 1.055002916868  | 1.825353170272  |
| C | 1.640955744447  | 2.200440622594  | 2.513775731532  |
| C | 1.205054024980  | 3.479378109480  | 2.119755010165  |
| C | 0.352952534171  | 3.555746875220  | 1.002744158883  |
| C | -0.052305882935 | 2.414629641212  | 0.317229914545  |
| C | -1.061127002311 | -0.590396531335 | -2.137343066370 |
| C | -1.049655514047 | -0.581044728675 | -3.528827888199 |
| C | -0.000342217585 | 0.014093227056  | -4.253787807867 |
| C | 1.045364995972  | 0.596389227214  | -3.513512891873 |
| C | 1.050652242408  | 0.579254707399  | -2.121542279275 |
| C | -1.155814775968 | -1.083126832106 | 1.916696787641  |
| C | -1.540536140333 | -2.233735758792 | 2.620569109478  |
| C | -1.213206352523 | -3.528131576760 | 2.161000161080  |
| C | -0.471367618627 | -3.617513103662 | 0.962967558147  |
| C | -0.067559107347 | -2.473676039121 | 0.259166747765  |
| H | 1.624096754105  | 0.084170945987  | 2.138570534952  |
| H | 2.327526184621  | 2.100986836538  | 3.349714381808  |
| H | -0.032937153975 | 4.520622271609  | 0.686422079896  |
| H | -0.728787102063 | 2.502264330316  | -0.527084843803 |
| H | -1.896825353201 | -1.036118092870 | -1.607381516058 |
| H | -1.894154073690 | -1.009970631768 | -4.060602490039 |
| H | 1.891472950406  | 1.036545667384  | -4.033414925862 |
| H | 1.883022545381  | 1.016201739846  | -1.579088540449 |

|   |                 |                 |                 |
|---|-----------------|-----------------|-----------------|
| H | -1.446887257643 | -0.104269411091 | 2.284626397270  |
| H | -2.139927586908 | -2.119295053291 | 3.519958373685  |
| H | -0.167916869566 | -4.592743260778 | 0.591660422248  |
| H | 0.524038819001  | -2.578744541085 | -0.644865761915 |
| C | -1.631334033300 | -4.742012787550 | 2.904220790266  |
| C | -1.961916602993 | -5.934625433149 | 2.231970625262  |
| C | -1.714309300329 | -4.748496802553 | 4.309879427653  |
| C | -2.354681803142 | -7.075985371409 | 2.930470251019  |
| H | -1.945267924018 | -5.960678716298 | 1.145955062762  |
| C | -2.109493165464 | -5.889504515409 | 5.007742539207  |
| H | -1.433599112892 | -3.859744671796 | 4.868047948543  |
| C | -2.438740935738 | -7.080687653425 | 4.334739305289  |
| H | -2.632538158642 | -7.966813974385 | 2.373849060614  |
| H | -2.130597789376 | -5.863997722470 | 6.093804680888  |
| C | 0.003117899661  | 0.026710759614  | -5.736119859885 |
| C | 0.561582133846  | 1.097623845656  | -6.457622737481 |
| C | -0.551318765560 | -1.032472159822 | -6.477502079794 |
| C | 0.566873564551  | 1.107588630711  | -7.849542254325 |
| H | 0.967610323263  | 1.951620183423  | -5.923168167753 |
| C | -0.548710009327 | -1.020684370208 | -7.869305525773 |
| H | -0.960196353841 | -1.894844867481 | -5.958809677833 |
| C | 0.011260416791  | 0.049023199172  | -8.589461303980 |
| H | 0.979235594086  | 1.967334811734  | -8.370092612198 |
| H | -0.958188406364 | -1.872109770484 | -8.405533100291 |
| C | 1.625884731819  | 4.697459170138  | 2.852436051948  |
| C | 1.831113549376  | 5.918083474155  | 2.183951323172  |
| C | 1.834376316770  | 4.678282442883  | 4.243351917539  |
| C | 2.223465099100  | 7.062494899208  | 2.872339290687  |
| H | 1.714727264804  | 5.965491745316  | 1.104981193101  |
| C | 2.229206232004  | 5.822302601294  | 4.931112746114  |
| H | 1.652335930879  | 3.763994217758  | 4.800956750937  |
| C | 2.432583272382  | 7.042326129416  | 4.262407130302  |
| H | 2.402256836312  | 7.978599806578  | 2.316464318407  |
| H | 2.349644678757  | 5.775537557834  | 6.009811736701  |
| C | -2.859420737402 | -8.295743730183 | 5.077949495412  |
| C | -3.645421076406 | -8.197221364156 | 6.240766640720  |

|   |                 |                  |                  |
|---|-----------------|------------------|------------------|
| C | -2.483817142686 | -9.578929837431  | 4.639686072833   |
| C | -4.040393170338 | -9.338701989436  | 6.939786326590   |
| H | -3.969129671147 | -7.219491267343  | 6.586443107017   |
| C | -2.880271241534 | -10.720826641741 | 5.337183332377   |
| H | -1.856518368187 | -9.681196458683  | 3.758423986482   |
| C | -3.660144490546 | -10.606317759956 | 6.491042114425   |
| H | -4.653654132739 | -9.237234937323  | 7.831350732784   |
| H | -2.571424485915 | -11.700844920820 | 4.982960685489   |
| H | -3.968172038876 | -11.495271373800 | 7.034668279565   |
| C | 0.015758997862  | 0.060354615142   | -10.074238396298 |
| C | 1.100990159687  | 0.596570877797   | -10.790513820548 |
| C | -1.065021625486 | -0.464927373270  | -10.805076827804 |
| C | 1.105042234106  | 0.608001820194   | -12.185347427625 |
| H | 1.958916234261  | 0.986219605891   | -10.249757596744 |
| C | -1.060760937894 | -0.455166094884  | -12.199877061636 |
| H | -1.926214002747 | -0.862670707789  | -10.275498310947 |
| C | 0.024267748144  | 0.081721474634   | -12.897033422124 |
| H | 1.958416859418  | 1.021129964870   | -12.716614429710 |
| H | -1.910925619051 | -0.860144783253  | -12.742437828088 |
| H | 0.027547286093  | 0.089938534908   | -13.983530710010 |
| C | 2.852446655379  | 8.263092062969   | 4.996259943781   |
| C | 2.364189126543  | 9.530952806878   | 4.630818253724   |
| C | 3.749899432831  | 8.185240392797   | 6.076748842234   |
| C | 2.759168893306  | 10.678317783477  | 5.319494214377   |
| H | 1.651496987810  | 9.615176002310   | 3.815081602089   |
| C | 4.143966770771  | 9.332270390950   | 6.766726617649   |
| H | 4.160018142052  | 7.220838371232   | 6.363364008845   |
| C | 3.650701725378  | 10.584632787909  | 6.391087931092   |
| H | 2.362553539588  | 11.645863856244  | 5.023260303415   |
| H | 4.844349441265  | 9.247766717959   | 7.593500939012   |
| H | 3.957872485122  | 11.477996622869  | 6.927889183993   |

**Radical cation of tri([1,1':4',1''-terphenyl]-4-yl)amine (3<sup>•+</sup>)**

|   |                 |                |                 |
|---|-----------------|----------------|-----------------|
| N | -0.014854825477 | 0.002800264366 | -0.001234827513 |
| C | -0.018823680637 | 0.006547287337 | -1.411922726861 |
| C | 0.388920822488  | 1.156076679081 | 0.705365897248  |

|   |                 |                 |                 |
|---|-----------------|-----------------|-----------------|
| C | -0.411286355123 | -1.152846897415 | 0.705427855545  |
| C | 1.162989919542  | 1.038823906013  | 1.877549933410  |
| C | 1.556964438126  | 2.175010865234  | 2.563288690884  |
| C | 1.195998652392  | 3.467612795493  | 2.121968715510  |
| C | 0.417489848745  | 3.563173491161  | 0.947203700677  |
| C | 0.021423173899  | 2.437119982048  | 0.246400411863  |
| C | -1.040435739148 | -0.653751171427 | -2.124910207363 |
| C | -1.034709991544 | -0.646059936024 | -3.509189903066 |
| C | -0.019004616114 | 0.008892639814  | -4.240711764701 |
| C | 0.994962200670  | 0.664730284810  | -3.508018269605 |
| C | 1.001096169930  | 0.669972105658  | -2.124161363244 |
| C | -1.163907967851 | -1.038142267860 | 1.892021742939  |
| C | -1.551238644847 | -2.175726533965 | 2.578849711798  |
| C | -1.206333606965 | -3.467575437035 | 2.123729007453  |
| C | -0.449213130685 | -3.561261270552 | 0.934880898820  |
| C | -0.058410060667 | -2.433515646783 | 0.233827461125  |
| H | 1.485002849538  | 0.060624789408  | 2.216900233982  |
| H | 2.192669454088  | 2.061555682442  | 3.434722835534  |
| H | 0.080980172074  | 4.534773147958  | 0.602181296836  |
| H | -0.607630193689 | 2.536640281681  | -0.631254609302 |
| H | -1.852541246062 | -1.131227743461 | -1.588007944291 |
| H | -1.855563542451 | -1.120851390751 | -4.035630000359 |
| H | 1.815957165031  | 1.140632420696  | -4.033147919881 |
| H | 1.813402925820  | 1.146406663161  | -1.586782152489 |
| H | -1.475097191138 | -0.060229560329 | 2.242115267209  |
| H | -2.169915590525 | -2.064417522148 | 3.462726444992  |
| H | -0.124950155954 | -4.533047135888 | 0.578594923994  |
| H | 0.555182663485  | -2.532456859537 | -0.654635967118 |
| C | -1.621415427785 | -4.673533108609 | 2.862529987290  |
| C | -1.855916555984 | -5.892866607570 | 2.197082519159  |
| C | -1.799002949928 | -4.648302089744 | 4.259818999778  |
| C | -2.251743049800 | -7.027348010570 | 2.893982137102  |
| H | -1.767536917751 | -5.945338276313 | 1.116230335007  |
| C | -2.186781042704 | -5.786381009822 | 4.955508573414  |
| H | -1.591464677424 | -3.739074462079 | 4.815849015939  |
| C | -2.425236835413 | -7.003880324555 | 4.290580175284  |

|   |                 |                  |                  |
|---|-----------------|------------------|------------------|
| H | -2.460819050108 | -7.938611523290  | 2.342001867859   |
| H | -2.275309941716 | -5.738694075667  | 6.036517520618   |
| C | -0.014533470423 | 0.007072910256   | -5.714628620525  |
| C | 0.539862483760  | 1.077540504310   | -6.443489045147  |
| C | -0.561715964133 | -1.065824838298  | -6.445608211570  |
| C | 0.543110058670  | 1.075642172516   | -7.832452007429  |
| H | 0.936753335169  | 1.941400185533   | -5.919149806808  |
| C | -0.549524781529 | -1.069118431924  | -7.834751189107  |
| H | -0.964692156070 | -1.927630058993  | -5.922455173911  |
| C | 0.001425655129  | 0.001651673484   | -8.563351501743  |
| H | 0.944042180940  | 1.935897112324   | -8.359672044442  |
| H | -0.944381472082 | -1.931332129685  | -8.363328737046  |
| C | 1.615888141035  | 4.672562681541   | 2.860129574272   |
| C | 1.820681880346  | 5.899604818933   | 2.198884783813   |
| C | 1.827247818417  | 4.639622628589   | 4.252559488572   |
| C | 2.220306113576  | 7.033451806007   | 2.894844505564   |
| H | 1.706170796541  | 5.959799288629   | 1.120855239802   |
| C | 2.220081211625  | 5.776443630846   | 4.947304917172   |
| H | 1.643151199937  | 3.724608526187   | 4.806876969746   |
| C | 2.428628235508  | 7.001567795204   | 4.286506611923   |
| H | 2.405108190606  | 7.951241617640   | 2.345022510025   |
| H | 2.335990689581  | 5.721297145922   | 6.025425702557   |
| C | -2.842769344247 | -8.217081657080  | 5.033558512239   |
| C | -3.673609969782 | -8.121812896552  | 6.164748564792   |
| C | -2.417924777622 | -9.494720360023  | 4.625946823444   |
| C | -4.065713863143 | -9.263179945264  | 6.862646006162   |
| H | -4.037198187210 | -7.149400872005  | 6.484071638258   |
| C | -2.808749633885 | -10.635632923407 | 5.325185813922   |
| H | -1.754641853653 | -9.593072182012  | 3.771381300527   |
| C | -3.634616710088 | -10.525171701627 | 6.446483411388   |
| H | -4.715352944211 | -9.166829744645  | 7.728304052143   |
| H | -2.461019218759 | -11.611700595428 | 4.997980065342   |
| H | -3.939634240011 | -11.414453097847 | 6.990964145082   |
| C | 0.011707918949  | -0.001436204988  | -10.045854576234 |
| C | 1.077232075158  | 0.574218314758   | -10.761576673523 |
| C | -1.043199592917 | -0.580114428235  | -10.774696483146 |

|   |                 |                 |                  |
|---|-----------------|-----------------|------------------|
| C | 1.087693926338  | 0.570541439140  | -12.155621574888 |
| H | 1.916578981770  | 1.003824859847  | -10.222250373929 |
| C | -1.033377784168 | -0.581636550257 | -12.168736252229 |
| H | -1.890455532986 | -1.008093550722 | -10.246511192991 |
| C | 0.032222895056  | -0.006881495307 | -12.865673312717 |
| H | 1.925606656761  | 1.012804182991  | -12.687606911082 |
| H | -1.863385261851 | -1.026060276587 | -12.711179714030 |
| H | 0.040077906523  | -0.009004057227 | -13.952051283983 |
| C | 2.852160076640  | 8.212929015118  | 5.029079220621   |
| C | 2.401541219802  | 9.489506017784  | 4.646544043200   |
| C | 3.715648464763  | 8.116578473634  | 6.135517286057   |
| C | 2.799248075932  | 10.627993927008 | 5.345917984475   |
| H | 1.713448912236  | 9.588639469155  | 3.811934664546   |
| C | 4.114935640328  | 9.255541721964  | 6.833130513043   |
| H | 4.098868242958  | 7.145395934109  | 6.435275756576   |
| C | 3.658069258682  | 10.516438914519 | 6.442028918905   |
| H | 2.431317345360  | 11.603052619830 | 5.038366449469   |
| H | 4.789950255961  | 9.158236970491  | 7.679051453321   |
| H | 3.968534006374  | 11.403948884880 | 6.986304054046   |

**Tris(4-(5-(naphthalen-1-yl)thiophen-2-yl)phenyl)amine (4)**

|   |                 |                 |                 |
|---|-----------------|-----------------|-----------------|
| N | 0.087202068552  | 0.012825395964  | -0.084497720426 |
| C | 0.133987146347  | 0.013750763329  | -1.504360856081 |
| C | 0.415611141318  | 1.190305854314  | 0.638738284628  |
| C | -0.296266472247 | -1.164857841260 | 0.611786901987  |
| C | 1.171256832291  | 1.120614529204  | 1.820224204409  |
| C | 1.479375926163  | 2.276931241126  | 2.530956302568  |
| C | 1.070753996958  | 3.545363003423  | 2.084886991741  |
| C | 0.321216151950  | 3.603591052719  | 0.896561417740  |
| C | -0.010282746503 | 2.451408457447  | 0.190035246837  |
| C | -0.867298558198 | -0.620803936238 | -2.256715383141 |
| C | -0.812720004056 | -0.620887847969 | -3.647563818116 |
| C | 0.222993258321  | 0.026335214053  | -4.342672743441 |
| C | 1.218669020608  | 0.660651855397  | -3.578733350552 |
| C | 1.184050045810  | 0.648789531763  | -2.187657547205 |
| C | -1.151466642048 | -1.096746645278 | 1.723169855065  |

|   |                 |                 |                 |
|---|-----------------|-----------------|-----------------|
| C | -1.513149587183 | -2.253239316537 | 2.407837644990  |
| C | -1.059147749796 | -3.520064242937 | 2.002909321515  |
| C | -0.209178359058 | -3.576601683652 | 0.884038307018  |
| C | 0.174166643283  | -2.424000183554 | 0.204815900613  |
| H | 1.521570612180  | 0.157519152466  | 2.177316359995  |
| H | 2.074123215616  | 2.198437748838  | 3.436915124336  |
| H | -0.040036031205 | 4.562874572841  | 0.537174067291  |
| H | -0.612191077647 | 2.525456529911  | -0.709965180693 |
| H | -1.693297875745 | -1.107833070833 | -1.748422564445 |
| H | -1.605492686823 | -1.108387160011 | -4.208415806096 |
| H | 2.053426163104  | 1.142329410544  | -4.079798895010 |
| H | 1.979230481127  | 1.126235720866  | -1.624082898066 |
| H | -1.536696819912 | -0.134876646297 | 2.045991913799  |
| H | -2.184211295802 | -2.176450299967 | 3.258937350795  |
| H | 0.189098392980  | -4.533997758326 | 0.560601657744  |
| H | 0.851574903810  | -2.495772483193 | -0.640095788457 |
| C | 0.280008436575  | -0.022666376419 | -5.829866200010 |
| C | 0.401449641258  | 1.163966576644  | -6.635324365277 |
| C | 0.212762895224  | -1.256266637237 | -6.459479484306 |
| C | 0.494221276100  | 1.027917152941  | -8.063311683783 |
| C | 0.395173842698  | 2.479374426510  | -6.090390905021 |
| C | 0.290360081232  | -1.382178053466 | -7.864931903407 |
| H | 0.126540147884  | -2.152915291603 | -5.851980010750 |
| C | 0.621172295214  | 2.194579114436  | -8.866625546469 |
| C | 0.440786601034  | -0.264145603303 | -8.651505383073 |
| C | 0.510690558904  | 3.589945408494  | -6.898311006530 |
| H | 0.284078523011  | 2.606695293321  | -5.019381271041 |
| H | 0.245091399588  | -2.369716634095 | -8.315756136115 |
| C | 0.635805712206  | 3.449115299455  | -8.300981318331 |
| H | 0.699159356158  | 2.075031732107  | -9.944689390574 |
| H | 0.514554383353  | -0.351334219557 | -9.732754510883 |
| H | 0.498984540616  | 4.582389426672  | -6.455897901307 |
| H | 0.731158240082  | 4.331758737235  | -8.927426071383 |
| C | 1.372002814551  | 4.761884683269  | 2.889079691306  |
| C | 2.013256061306  | 5.920177678943  | 2.324566436300  |
| C | 1.018817646312  | 4.778173696606  | 4.229930773672  |

|   |                 |                 |                 |
|---|-----------------|-----------------|-----------------|
| C | 2.224028572158  | 7.072781816465  | 3.157177052576  |
| C | 2.488755945327  | 5.970908084324  | 0.983487358422  |
| C | 1.242560009854  | 5.909187417849  | 5.047157871415  |
| H | 0.529539618070  | 3.906534601541  | 4.655795028012  |
| C | 2.849671755746  | 8.224565036534  | 2.605340016836  |
| C | 1.821483725890  | 7.039455677172  | 4.519198203512  |
| C | 3.099782713866  | 7.100114672646  | 0.482409302345  |
| H | 2.377825072472  | 5.097469951456  | 0.350675071825  |
| H | 0.939165365122  | 5.882555035248  | 6.090125464282  |
| C | 3.274246439519  | 8.244669456399  | 1.296372411407  |
| H | 2.994078929008  | 9.092020071927  | 3.245089324332  |
| H | 1.985014159747  | 7.919833951884  | 5.135941171626  |
| H | 3.456751191871  | 7.109988621388  | -0.543890123280 |
| H | 3.753099002775  | 9.130862809748  | 0.889017509664  |
| C | -1.419959295263 | -4.735584853798 | 2.783878145279  |
| C | -1.996588061469 | -5.903681516562 | 2.171877862493  |
| C | -1.189167905405 | -4.740048494499 | 4.151287696856  |
| C | -2.271286123089 | -7.052965555058 | 2.990437663067  |
| C | -2.348436167673 | -5.967898652783 | 0.793768214349  |
| C | -1.475211229689 | -5.868039484645 | 4.953010341255  |
| H | -0.748731906940 | -3.860811023285 | 4.613264249175  |
| C | -2.834246142206 | -8.214220349156 | 2.392911736307  |
| C | -1.993655971090 | -7.007138220081 | 4.382938027578  |
| C | -2.901250101801 | -7.106270721076 | 0.247863600958  |
| H | -2.189323407292 | -5.097563844767 | 0.167031174311  |
| H | -1.267592687190 | -5.831999131914 | 6.018895760386  |
| C | -3.138383168731 | -8.247128320107 | 1.051092887750  |
| H | -3.028320306123 | -9.078714988890 | 3.023472998538  |
| H | -2.204402496661 | -7.885047121516 | 4.988747317197  |
| H | -3.163856236122 | -7.126176724386 | -0.806387739237 |
| H | -3.570621012183 | -9.140467161167 | 0.608747886403  |

**Radical cation of tris(4-(5-(naphthalen-1-yl)thiophen-2-yl)phenyl)amine (4<sup>•+</sup>)**

|   |                 |                 |                 |
|---|-----------------|-----------------|-----------------|
| N | -0.302309656524 | -0.311620894228 | -0.020138014633 |
| C | 0.041902649601  | 1.058028932563  | -0.031189812884 |
| C | 0.710863887182  | -1.293705626208 | -0.002075963872 |



|   |                 |                 |                 |
|---|-----------------|-----------------|-----------------|
| C | -1.660664631959 | -0.696503393610 | -0.026719289069 |
| C | 0.558449338338  | -2.488507103593 | -0.734271484067 |
| C | 1.557084495756  | -3.448022109276 | -0.706455052057 |
| C | 2.741066533411  | -3.259671488592 | 0.038429787015  |
| C | 2.874508273812  | -2.058283227839 | 0.768339157709  |
| C | 1.883572034927  | -1.090700039402 | 0.753516182354  |
| C | -0.708395172700 | 1.984935506628  | 0.719318741504  |
| C | -0.362322240945 | 3.326274968717  | 0.705664518361  |
| C | 0.735655214952  | 3.797172533380  | -0.045575962162 |
| C | 1.470486783113  | 2.854797659973  | -0.797530141266 |
| C | 1.136757984038  | 1.510269954940  | -0.794559503616 |
| C | -2.091542003410 | -1.801233833273 | 0.734847543312  |
| C | -3.426260063872 | -2.171678527337 | 0.720427196847  |
| C | -4.380585360214 | -1.463020876566 | -0.040367979703 |
| C | -3.929647732724 | -0.361999416419 | -0.800467646421 |
| C | -2.597869762862 | 0.019287585609  | -0.798717291893 |
| H | -0.322739438932 | -2.638071549541 | -1.348091064152 |
| H | 1.440729233265  | -4.348061319009 | -1.301300812122 |
| H | 3.749032644030  | -1.904702887116 | 1.391232605490  |
| H | 1.988942631942  | -0.196135783170 | 1.357031732837  |
| H | -1.530525135296 | 1.641430379904  | 1.337218782117  |
| H | -0.926823064567 | 4.023345941746  | 1.316231704521  |
| H | 2.288107707241  | 3.191333641417  | -1.425720791074 |
| H | 1.690232401519  | 0.811520481892  | -1.412050313571 |
| H | -1.385552013516 | -2.335226760881 | 1.361055098509  |
| H | -3.749720565700 | -3.003511948030 | 1.337524932269  |
| H | -4.628130066937 | 0.173086405325  | -1.434775504405 |
| H | -2.267491285389 | 0.841350907385  | -1.423849608417 |
| C | 1.049243097973  | 5.243618088471  | -0.083570389869 |
| C | 2.387456495499  | 5.754195103042  | 0.071627530778  |
| C | 0.005480823617  | 6.134837773682  | -0.305719584399 |
| C | 2.604865770915  | 7.167149249297  | -0.073369310134 |
| C | 3.503739196251  | 4.942108223015  | 0.414144307547  |
| C | 0.227728714182  | 7.521068809217  | -0.435479044229 |
| H | -1.002511771175 | 5.749507527674  | -0.428507121579 |
| C | 3.918655204220  | 7.689878803104  | 0.070306186221  |

|   |                 |                 |                 |
|---|-----------------|-----------------|-----------------|
| C | 1.504571918077  | 8.025889326615  | -0.335987293408 |
| C | 4.765209657142  | 5.482265560317  | 0.554919874569  |
| H | 3.359919798019  | 3.881984429709  | 0.589702622125  |
| H | -0.612079217057 | 8.181199785134  | -0.630534128191 |
| C | 4.981065514767  | 6.867168070183  | 0.369830701281  |
| H | 4.066507014954  | 8.759930561931  | -0.050982747175 |
| H | 1.688024536036  | 9.091377349416  | -0.447700544653 |
| H | 5.599056901972  | 4.838305638057  | 0.819851877845  |
| H | 5.979965478837  | 7.279227738044  | 0.479743227875  |
| C | 3.765199517295  | -4.326862962306 | 0.095524285279  |
| C | 5.172781071910  | -4.065603993736 | -0.065784929587 |
| C | 3.341456550849  | -5.627470025580 | 0.344979188414  |
| C | 6.096820910738  | -5.153079697691 | 0.101709276122  |
| C | 5.698985270363  | -2.797037168325 | -0.435232221525 |
| C | 4.255610003638  | -6.689878150163 | 0.496853505592  |
| H | 2.280830522594  | -5.823161433656 | 0.472549587907  |
| C | 7.489864325444  | -4.914549545219 | -0.047867479192 |
| C | 5.607982046984  | -6.454655296855 | 0.391786743632  |
| C | 7.056663695535  | -2.600661387800 | -0.580932705492 |
| H | 5.021671895352  | -1.972697045113 | -0.627932367199 |
| H | 3.884965390823  | -7.687329760178 | 0.713153940055  |
| C | 7.964871658251  | -3.664139668407 | -0.373946294841 |
| H | 8.175762961591  | -5.746396106254 | 0.090452056179  |
| H | 6.321348718301  | -7.264618128145 | 0.520354163795  |
| H | 7.430628238729  | -1.621538908110 | -0.866626071060 |
| H | 9.031718642191  | -3.495371899349 | -0.488057936619 |
| C | -5.789506004342 | -1.916317066867 | -0.079748743349 |
| C | -6.902257541549 | -1.013468735278 | 0.068150956928  |
| C | -6.036791454519 | -3.267302902378 | -0.295701111306 |
| C | -8.233589243696 | -1.534426749190 | -0.076074631792 |
| C | -6.759148511022 | 0.361235092962  | 0.403215397676  |
| C | -7.347337629185 | -3.770504583529 | -0.426057203767 |
| H | -5.197598436770 | -3.946688299362 | -0.412671760306 |
| C | -9.344528924181 | -0.658773534212 | 0.062038838180  |
| C | -8.424409657477 | -2.918227318225 | -0.332478198537 |
| C | -7.858903969987 | 1.183001912363  | 0.538070892855  |

|   |                  |                 |                 |
|---|------------------|-----------------|-----------------|
| H | -5.769967894119  | 0.768822335242  | 0.578557444405  |
| H | -7.497291426556  | -4.828949741584 | -0.616501114041 |
| C | -9.165261945616  | 0.674541503730  | 0.354556629457  |
| H | -10.344631930011 | -1.067601732680 | -0.057726669777 |
| H | -9.437937404516  | -3.294488510221 | -0.444427475251 |
| H | -7.719868693337  | 2.228730206502  | 0.797430935298  |
| H | -10.022642505514 | 1.332829147320  | 0.460478159808  |

**Tris(4-(5-(naphthalen-2-yl)thiophen-2-yl)phenyl)amine (5)**

|   |                 |                 |                 |
|---|-----------------|-----------------|-----------------|
| N | -0.010888266257 | -0.003225569635 | 0.019564277355  |
| C | -0.004026579316 | -0.009072507746 | -1.400801680093 |
| C | 0.383767061123  | 1.162310450459  | 0.727800975298  |
| C | -0.409942829970 | -1.166941917859 | 0.729975829339  |
| C | 1.159057313764  | 1.067256185783  | 1.895238943418  |
| C | 1.534128869292  | 2.211902880756  | 2.590901998653  |
| C | 1.175200170434  | 3.496012652191  | 2.143577559104  |
| C | 0.404122107305  | 3.578209864527  | 0.970156030037  |
| C | 0.006620386673  | 2.439123915551  | 0.278709993456  |
| C | -1.042128794380 | -0.621571265819 | -2.121582314233 |
| C | -1.026649378416 | -0.633829076871 | -3.512478923930 |
| C | 0.007371244963  | -0.020463071407 | -4.242410093479 |
| C | 1.038535975325  | 0.593558469366  | -3.508886562013 |
| C | 1.042019774892  | 0.594626267620  | -2.118321424950 |
| C | -1.223545619286 | -1.070566010509 | 1.870524785862  |
| C | -1.600571833279 | -2.212815703811 | 2.569212174006  |
| C | -1.203711720134 | -3.495775410620 | 2.151392983053  |
| C | -0.395230127461 | -3.579194395247 | 1.003314418751  |
| C | 0.002376728622  | -2.441997725514 | 0.308776848342  |
| H | 1.475791275616  | 0.092271658546  | 2.251144857569  |
| H | 2.153645541755  | 2.104792126406  | 3.476826707089  |
| H | 0.075066278338  | 4.549924900469  | 0.612919525455  |
| H | -0.610271942589 | 2.534968484367  | -0.608914351840 |
| H | -1.868098163847 | -1.080034424775 | -1.587467498563 |
| H | -1.857461729884 | -1.094442091950 | -4.039462992314 |
| H | 1.874568713243  | 1.045160289501  | -4.035273908362 |
| H | 1.865207698617  | 1.054800430282  | -1.581382349204 |

|   |                 |                 |                  |
|---|-----------------|-----------------|------------------|
| H | -1.567609201842 | -0.096615105365 | 2.203375181728   |
| H | -2.249617814501 | -2.105132713627 | 3.433583860504   |
| H | -0.037048905507 | -4.548971321873 | 0.669685047216   |
| H | 0.647656432623  | -2.537538474362 | -0.558550295405  |
| C | 0.007738044740  | -0.017478499242 | -5.725341496006  |
| C | 0.483035427077  | 1.069080467093  | -6.443759903278  |
| C | -0.488703240110 | -1.142183736961 | -6.451269979587  |
| C | 0.488594243466  | 1.085566338720  | -7.862606903669  |
| H | 0.840387231187  | 1.951427834096  | -5.918760493664  |
| C | -0.497635399391 | -1.157857452934 | -7.825715931217  |
| H | -0.841705186205 | -2.010748347165 | -5.903074506321  |
| C | -0.013120074173 | -0.051909339186 | -8.575628389882  |
| C | 0.968545560099  | 2.201226652880  | -8.603592370528  |
| H | -0.870819934225 | -2.029467128280 | -8.358269676536  |
| C | -0.008824743154 | -0.033495587839 | -9.996080534321  |
| C | 0.957603104675  | 2.189950711641  | -9.980882518995  |
| H | 1.346476067125  | 3.065450710527  | -8.062429657950  |
| C | 0.465304576097  | 1.061850126494  | -10.684679459296 |
| H | -0.388036386877 | -0.900339123265 | -10.532231889836 |
| H | 1.327911615919  | 3.048097387592  | -10.535102478912 |
| H | 0.462850615335  | 1.065927760842  | -11.771201763363 |
| C | -1.620905326436 | -4.711937451812 | 2.890396297552   |
| C | -1.900182933554 | -5.897491634787 | 2.227787746763   |
| C | -1.743465923866 | -4.688024569184 | 4.312680694587   |
| C | -2.294453261598 | -7.070326195816 | 2.922393458070   |
| H | -1.842772350903 | -5.937747834613 | 1.142925184589   |
| C | -2.123458222759 | -5.806527668323 | 5.015463799855   |
| H | -1.504762773029 | -3.774214893667 | 4.848816287524   |
| C | -2.410386417295 | -7.029462433199 | 4.350353707035   |
| C | -2.586789483301 | -8.287460013607 | 2.246137169577   |
| H | -2.199465714946 | -5.768751281554 | 6.099605797605   |
| C | -2.804538861157 | -8.204360638992 | 5.044866848319   |
| C | -2.968321040286 | -9.409691091285 | 2.947664850837   |
| H | -2.501794914327 | -8.317553103869 | 1.162436292980   |
| C | -3.077441864848 | -9.368905815531 | 4.360681095333   |
| H | -2.888578853103 | -8.168966865987 | 6.128559449798   |

|   |                 |                  |                |
|---|-----------------|------------------|----------------|
| H | -3.187433316010 | -10.333476066529 | 2.419190080684 |
| H | -3.378986095390 | -10.261423354110 | 4.902010788342 |
| C | 1.595981761325  | 4.713949812598   | 2.877314695219 |
| C | 1.931740636814  | 5.879712350046   | 2.205962314313 |
| C | 1.666717817966  | 4.711384134055   | 4.303239792080 |
| C | 2.335269730135  | 7.052592762798   | 2.895212712806 |
| H | 1.914508773953  | 5.902614921090   | 1.119184848754 |
| C | 2.053178643040  | 5.830773783295   | 5.001123073655 |
| H | 1.383771736731  | 3.813394612409   | 4.844713386335 |
| C | 2.399394524844  | 7.033277461601   | 4.326912854712 |
| C | 2.688292445937  | 8.248613928539   | 2.210239010667 |
| H | 2.089353676326  | 5.809486763152   | 6.087814949050 |
| C | 2.804311542246  | 8.207782754112   | 5.015915655419 |
| C | 3.079433850666  | 9.370720303795   | 2.906676335397 |
| H | 2.642781576343  | 8.262620238415   | 1.123788329001 |
| C | 3.137194945937  | 9.351463508968   | 4.323170460009 |
| H | 2.848722031284  | 8.188658847584   | 6.102346137764 |
| H | 3.345448599859  | 10.278093376386  | 2.371299167075 |
| H | 3.446798391900  | 10.243758260180  | 4.860264239809 |

**Radical cation of tris(4-(5-(naphthalen-2-yl)thiophen-2-yl)phenyl)amine (5<sup>+</sup>)**

|   |                 |                 |                 |
|---|-----------------|-----------------|-----------------|
| N | -0.175426205841 | -0.172212599977 | 0.031608262000  |
| C | 0.179781209989  | 1.194115186939  | 0.028878736582  |
| C | 0.828688398967  | -1.163180986960 | 0.023565659551  |
| C | -1.536921231020 | -0.545333559015 | 0.039418837941  |
| C | 0.649733790631  | -2.352620547635 | -0.711971369498 |
| C | 1.639517081426  | -3.320643896646 | -0.715000825319 |
| C | 2.842456731587  | -3.148718980592 | 0.004402820374  |
| C | 3.002212411708  | -1.952030853981 | 0.737563701708  |
| C | 2.021929546296  | -0.975084720919 | 0.751191076502  |
| C | -0.558120563054 | 2.121958273364  | 0.791018399173  |
| C | -0.202855718207 | 3.460277644807  | 0.786197060842  |
| C | 0.892641076022  | 3.930793955010  | 0.029339237381  |
| C | 1.615633352827  | 2.986363779873  | -0.732484422533 |
| C | 1.274832437497  | 1.644862451041  | -0.735904580559 |
| C | -1.968625800746 | -1.651959442596 | 0.797930484752  |

|   |                 |                 |                 |
|---|-----------------|-----------------|-----------------|
| C | -3.304800740447 | -2.014954264384 | 0.793864811854  |
| C | -4.262356089376 | -1.299769873924 | 0.041690693863  |
| C | -3.810077274078 | -0.193594180641 | -0.711344551943 |
| C | -2.478288022664 | 0.183503855374  | -0.715505111962 |
| H | -0.245957072200 | -2.490207670137 | -1.307125583430 |
| H | 1.498306731740  | -4.208018435164 | -1.322677666974 |
| H | 3.891519209057  | -1.807861127166 | 1.341701741341  |
| H | 2.151860525002  | -0.083716898111 | 1.354586544952  |
| H | -1.378000016820 | 1.780072093912  | 1.412764664893  |
| H | -0.757568320989 | 4.147821762573  | 1.415610846900  |
| H | 2.431540079474  | 3.318359988338  | -1.365299234048 |
| H | 1.822233662281  | 0.947021394258  | -1.359662402558 |
| H | -1.260466911613 | -2.193860634930 | 1.414838743614  |
| H | -3.620493146860 | -2.843749220800 | 1.418202542857  |
| H | -4.507811731738 | 0.350418686420  | -1.338906186295 |
| H | -2.150348766008 | 1.011474921876  | -1.334015704452 |
| C | 1.268151509258  | 5.357632424609  | 0.036438252055  |
| C | 2.593531224584  | 5.748721841681  | -0.112793462422 |
| C | 0.274766867164  | 6.369738309452  | 0.208989371070  |
| C | 2.975316141165  | 7.112514979031  | -0.093623934198 |
| H | 3.375100829410  | 5.000837390680  | -0.214012505680 |
| C | 0.613954860255  | 7.700000652539  | 0.222700823933  |
| H | -0.768444846171 | 6.083791859081  | 0.298020197986  |
| C | 1.966271909472  | 8.116461127469  | 0.075933563016  |
| C | 4.332599335721  | 7.515989697649  | -0.233770004023 |
| H | -0.157414926353 | 8.456773372027  | 0.340090671206  |
| C | 2.349800729404  | 9.482188515194  | 0.091376211045  |
| C | 4.673439977831  | 8.850046677457  | -0.212523598124 |
| H | 5.096263910813  | 6.752668870430  | -0.360204973668 |
| C | 3.673717753992  | 9.841461833233  | -0.049363598713 |
| H | 1.582557992817  | 10.241981943114 | 0.216629561212  |
| H | 5.712053769984  | 9.148780452582  | -0.321395194103 |
| H | 3.956700671306  | 10.890137775398 | -0.034877166124 |
| C | -5.683347358531 | -1.696836317562 | 0.040921873250  |
| C | -6.689933862736 | -0.749738132191 | -0.105174346743 |
| C | -6.055111575809 | -3.067500036120 | 0.196843406263  |

|   |                  |                 |                 |
|---|------------------|-----------------|-----------------|
| C | -8.059713443640  | -1.109978930954 | -0.100409438429 |
| H | -6.438048673071  | 0.303242199837  | -0.195762894562 |
| C | -7.374357133241  | -3.447548475285 | 0.195477390117  |
| H | -5.282069807914  | -3.824516556605 | 0.282697995112  |
| C | -8.416518158424  | -2.490190536156 | 0.050312578776  |
| C | -9.093275485419  | -0.141914902205 | -0.238957917732 |
| H | -7.637801844588  | -4.497029106408 | 0.298540072719  |
| C | -9.788693169766  | -2.850466110704 | 0.048342777587  |
| C | -10.416521208930 | -0.523136461240 | -0.235566285112 |
| H | -8.820285267775  | 0.904420642124  | -0.350189852392 |
| C | -10.767145893569 | -1.888864633067 | -0.091627353460 |
| H | -10.057254146067 | -3.897916711261 | 0.159876731158  |
| H | -11.198649036208 | 0.222793769690  | -0.343514336542 |
| H | -11.814875212210 | -2.175686192786 | -0.090880552543 |
| C | 3.894553733159   | -4.182513214950 | -0.012231076541 |
| C | 5.237757236382   | -3.835458240243 | 0.070873941317  |
| C | 3.553309849083   | -5.564981445887 | -0.126633372666 |
| C | 6.263389629368   | -4.811838265175 | 0.038865946561  |
| H | 5.527583901266   | -2.789830116082 | 0.128156023810  |
| C | 4.525342886312   | -6.534296223980 | -0.148226769562 |
| H | 2.508085168580   | -5.855452566633 | -0.162830515064 |
| C | 5.904941961375   | -6.195607154615 | -0.070501442532 |
| C | 7.640403045413   | -4.459980161762 | 0.107822990498  |
| H | 4.246307474319   | -7.582465211745 | -0.218876416847 |
| C | 6.933047635224   | -7.172825084126 | -0.097994601536 |
| C | 8.615290934133   | -5.432060437073 | 0.076355089511  |
| H | 7.910263439799   | -3.409916273751 | 0.187376860458  |
| C | 8.258747729180   | -6.799947677634 | -0.026349796767 |
| H | 6.659117787855   | -8.221737098856 | -0.178061087929 |
| H | 9.663858789302   | -5.153880451262 | 0.130539796182  |
| H | 9.037992733654   | -7.556388707168 | -0.049592858338 |

#### 4. Solubility test

To a sample of 5.0 mg, 100  $\mu$ L of solvent was added repeatedly. The resulting suspension was shaken and sonicated at room temperature (20-25°C). The solution was sealed during the dissolution process to prevent volatilization of the solvent. The total amount of solvent was converted to solubility (wt%). The results are summarized in Table S1.

Table S1. Solubility test of compounds **2-5** in dichloromethane, anisole, toluene and ethyl acetate at room temperature.

| Compound | dichloromethane | anisole | toluene | ethyl acetate |
|----------|-----------------|---------|---------|---------------|
| <b>2</b> | 0.42            | 0.44    | 0.33    | < 0.01        |
| <b>3</b> | 0.065           | 0.064   | 0.017   | < 0.01        |
| <b>4</b> | 5.23            | 5.05    | 4.41    | 0.21          |
| <b>5</b> | 0.48            | 0.53    | 0.23    | < 0.01        |



## 5. Cyclic voltammetry

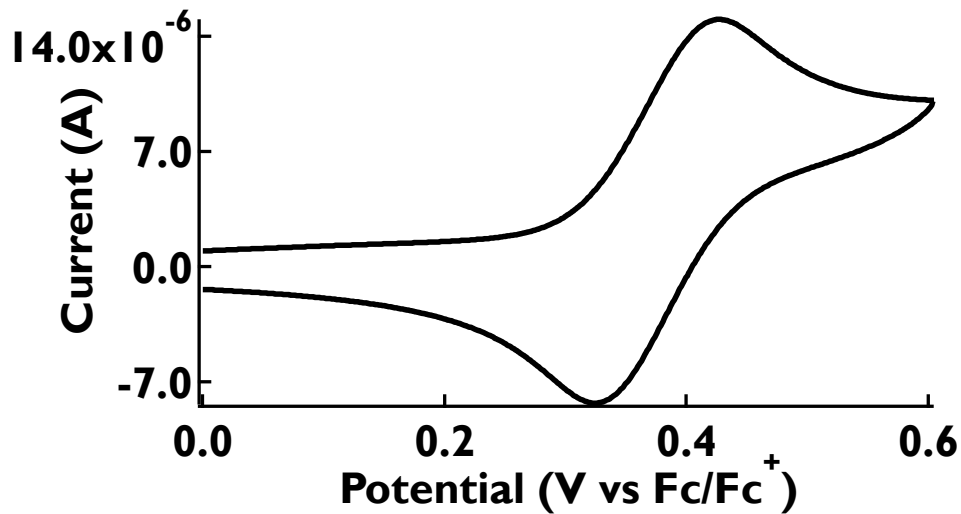

**Figure S5.** Cyclic voltammograms of **3** in dichloromethane ( $1 \times 10^{-3}$  M) with  $\text{Bu}_4\text{NPF}_6$  as a supporting electrolyte.

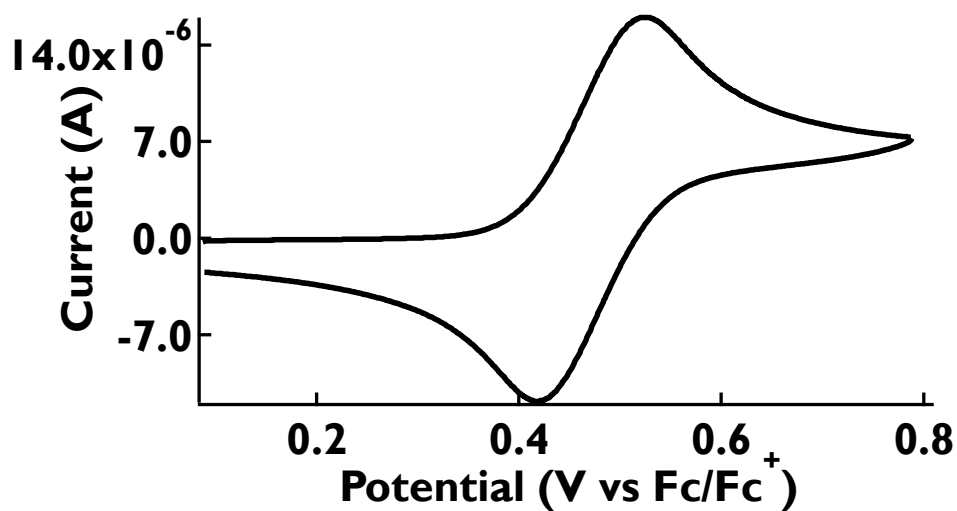

**Figure S6.** Cyclic voltammograms of **4** in dichloromethane ( $1 \times 10^{-3}$  M) with  $\text{Bu}_4\text{NPF}_6$  as a supporting electrolyte.

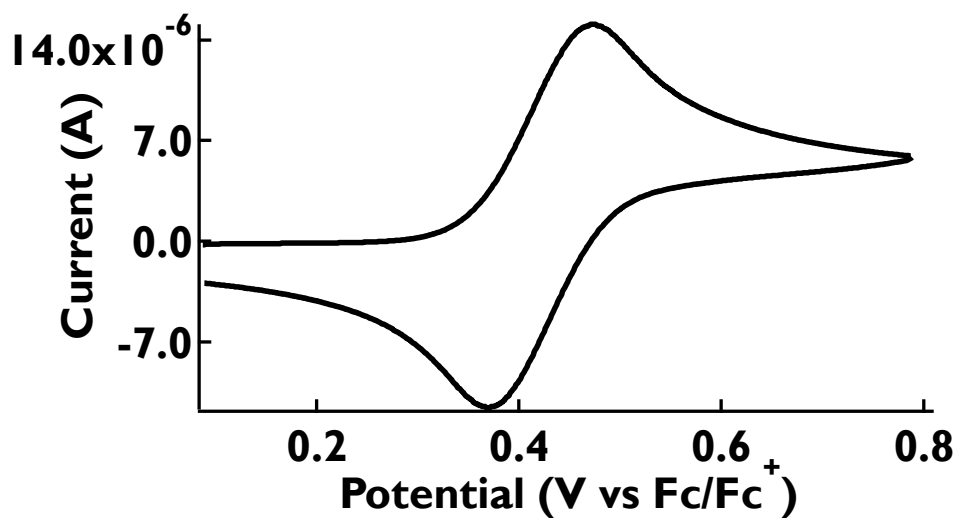

**Figure S7.** Cyclic voltammograms of **5** in dichloromethane ( $1 \times 10^{-3}$  M) with  $\text{Bu}_4\text{NPF}_6$  as a supporting electrolyte.

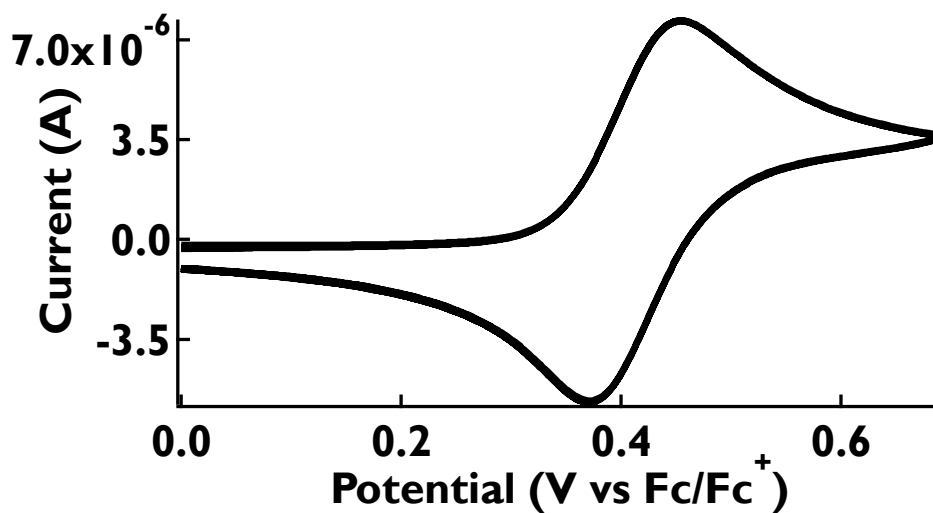

**Figure S8.** Cyclic voltammogram of **2** in dichloromethane ( $1 \times 10^{-3}$  M) after repeating sweep ten cycles in the range of -0.03 and 0.69 V (vs  $\text{Fc}/\text{Fc}^+$ ). The scan rate is 25 mV/s.  $\text{Bu}_4\text{NPF}_6$  ( $1 \times 10^{-1}$  M) was employed as a supporting electrolyte.

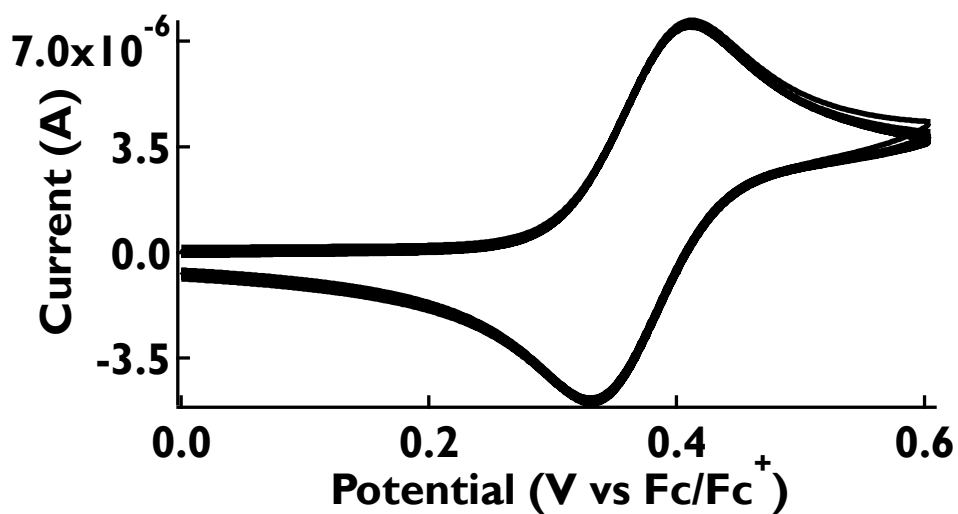

**Figure S9.** Cyclic voltammogram of **3** in dichloromethane ( $1 \times 10^{-3}$  M) after repeating sweep ten cycles in the range of -0.03 and 0.60 V (vs Fc/Fc<sup>+</sup>). The scan rate is 25 mV/s. Bu<sub>4</sub>NPF<sub>6</sub> ( $1 \times 10^{-1}$  M) was employed as a supporting electrolyte.

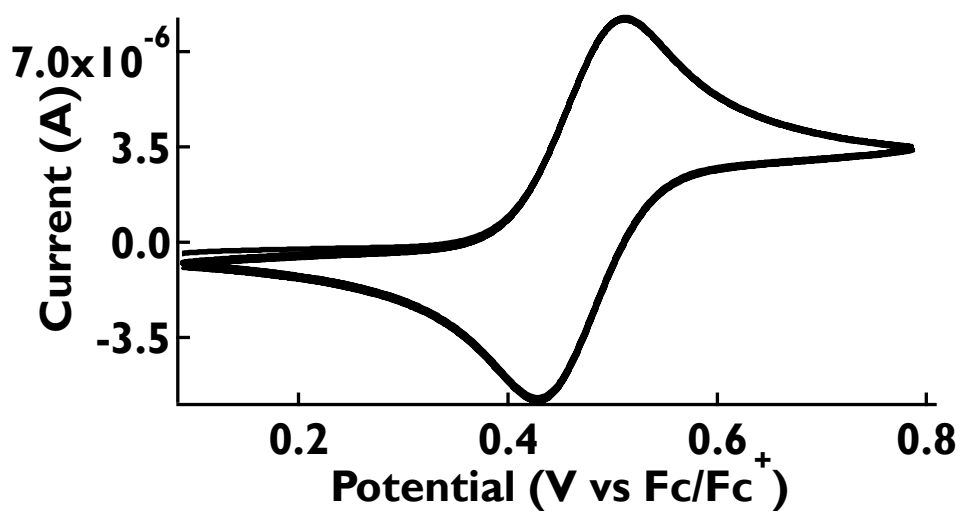

**Figure S10.** Cyclic voltammogram of **4** in dichloromethane ( $1 \times 10^{-3}$  M) after repeating sweep ten cycles in the range of 0.09 and 0.79 V (vs Fc/Fc<sup>+</sup>). The scan rate is 25 mV/s. Bu<sub>4</sub>NPF<sub>6</sub> ( $1 \times 10^{-1}$  M) was employed as a supporting electrolyte.

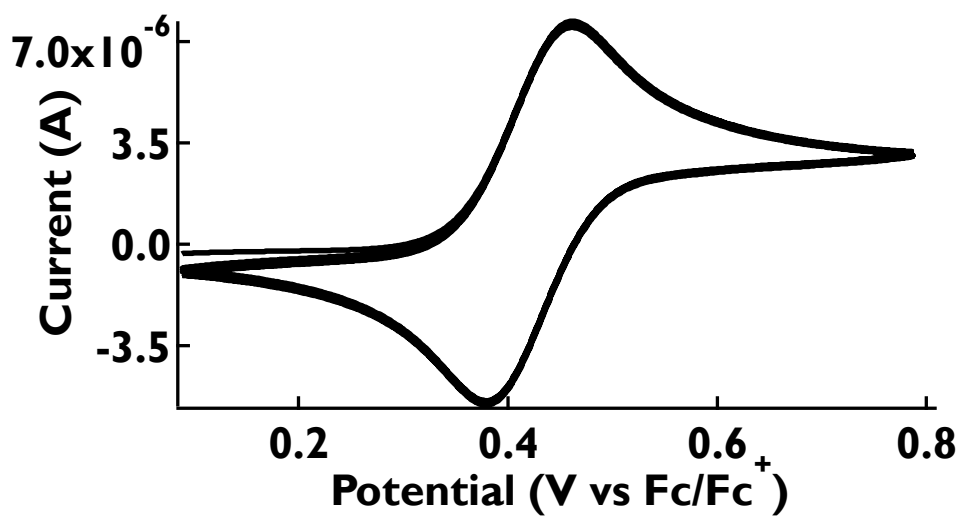

**Figure S11.** Cyclic voltammogram of **5** in dichloromethane ( $1 \times 10^{-3}$  M) after repeating sweep ten cycles in the range of 0.09 and 0.79 V (vs Fc/Fc<sup>+</sup>). The scan rate is 25 mV/s. Bu<sub>4</sub>NPF<sub>6</sub> ( $1 \times 10^{-1}$  M) was employed as a supporting electrolyte.

## 6. Absorption and fluorescence spectra of the neutral or oxidized species

Typical procedure for the preparation of radical cationic species for UV measurements is as follows. To a solution of Ar<sub>3</sub>-TPA in dry dichloromethane ( $5.0 \times 10^{-4}$  M, 100  $\mu$ L) was added a solution of SbCl<sub>5</sub> in dry dichloromethane ( $5.0 \times 10^{-3}$  M, 100  $\mu$ L). The obtained solution was diluted to 5 mL with dry dichloromethane.

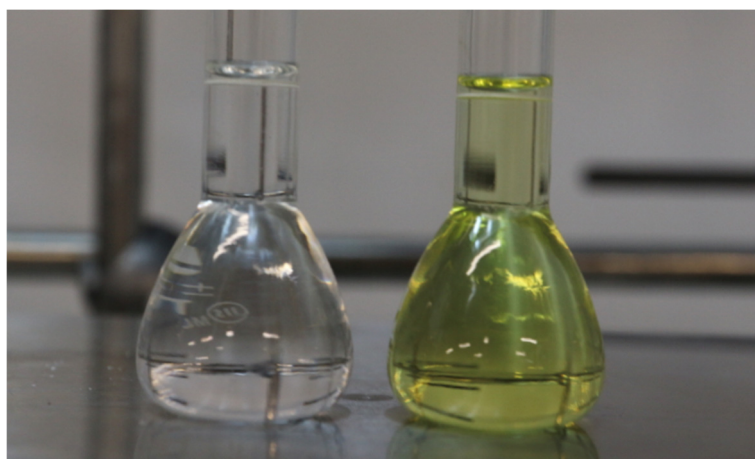

**Figure S12.** Dichloromethane solution of **3** in the absence (left) and presence of ten equivalents of SbCl<sub>5</sub> (right). [**3**] =  $1 \times 10^{-5}$  M.

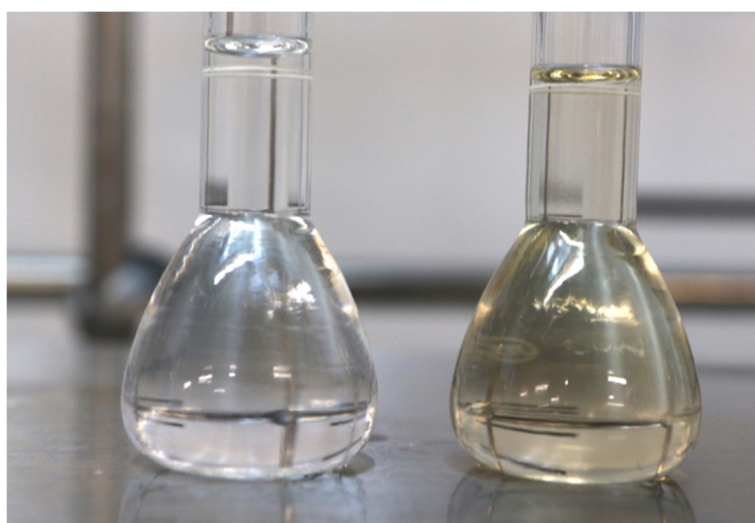

**Figure S13.** Dichloromethane solution of **4** in the absence (left) and presence of ten equivalents of SbCl<sub>5</sub> (right). [**4**] =  $1 \times 10^{-5}$  M.

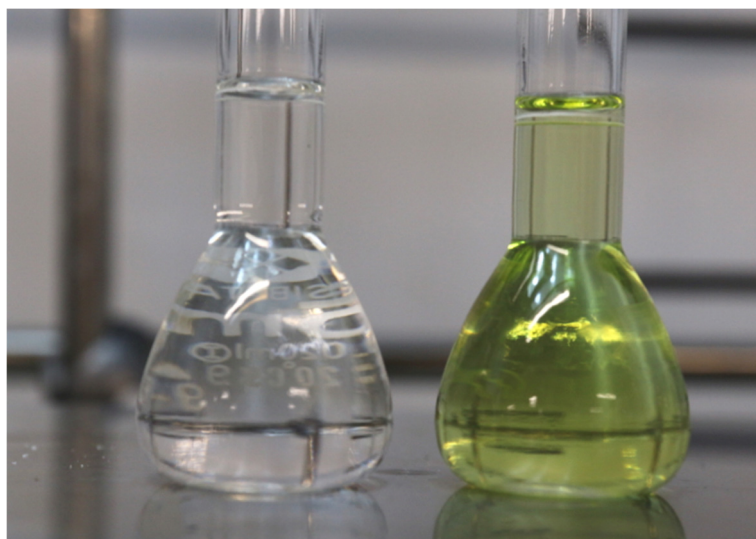

**Figure S14.** Dichloromethane solution of **5** in the absence (left) and presence of ten equivalents of  $\text{SbCl}_5$  (right).  $[\mathbf{5}] = 1 \times 10^{-5} \text{ M}$ .

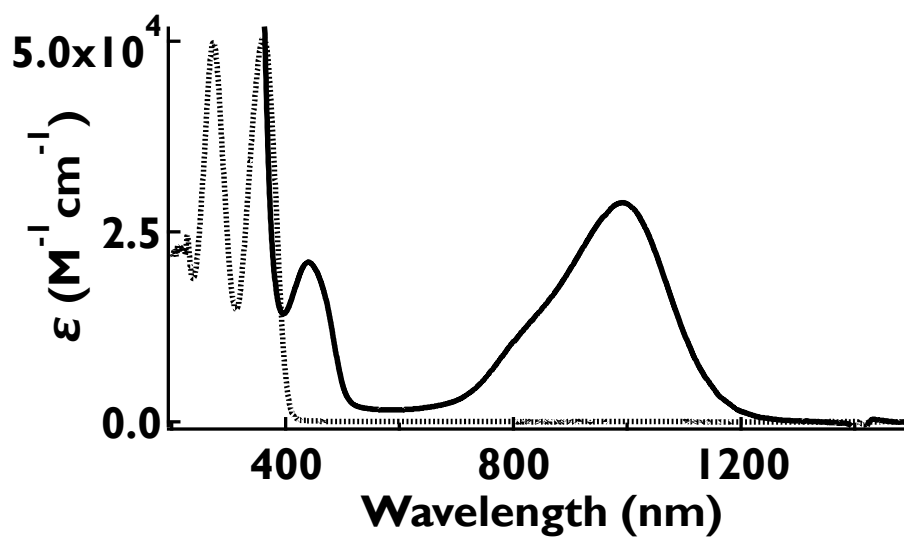

**Figure S15.** Absorption spectra of **3** before (dotted line) and after oxidation with 10 equivalents of  $\text{SbCl}_5$  (solid line) in dichloromethane at room temperature.  $[\mathbf{3}] = 1 \times 10^{-5} \text{ M}$ .

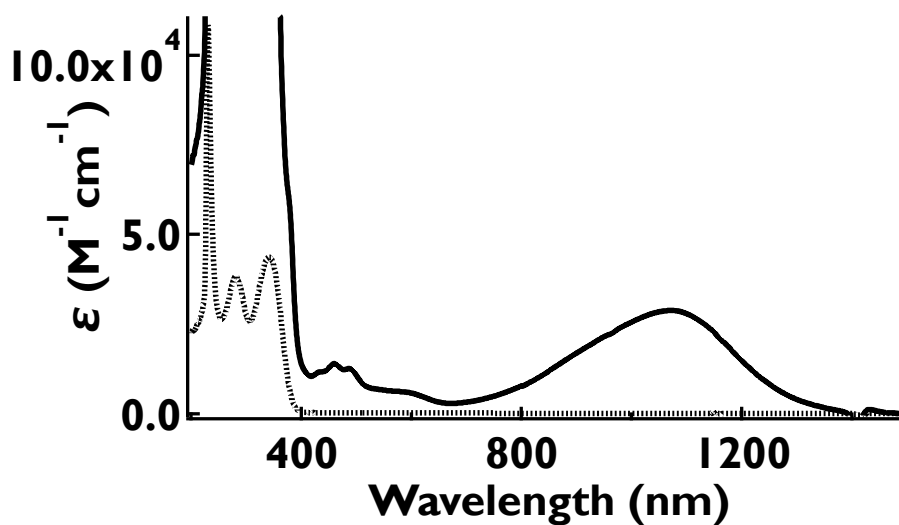

**Figure S16.** Absorption spectra of **4** before (dotted line) and after oxidation with 10 equivalents of  $\text{SbCl}_5$  (solid line) in dichloromethane at room temperature.  $[\mathbf{4}] = 1 \times 10^{-5} \text{ M}$ .

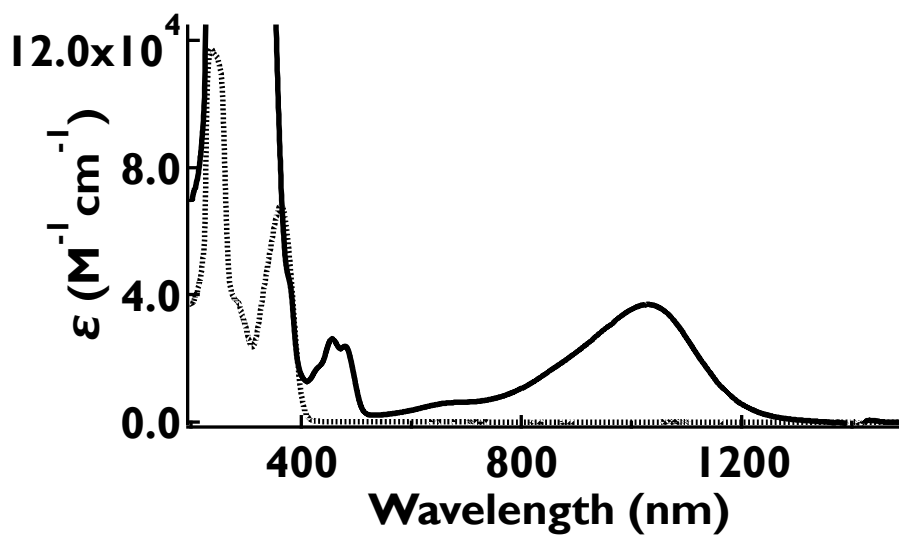

**Figure S17.** Absorption spectra of **5** before (dotted line) and after oxidation with 10 equivalents of  $\text{SbCl}_5$  (solid line) in dichloromethane at room temperature.  $[\mathbf{5}] = 1 \times 10^{-5} \text{ M}$ .

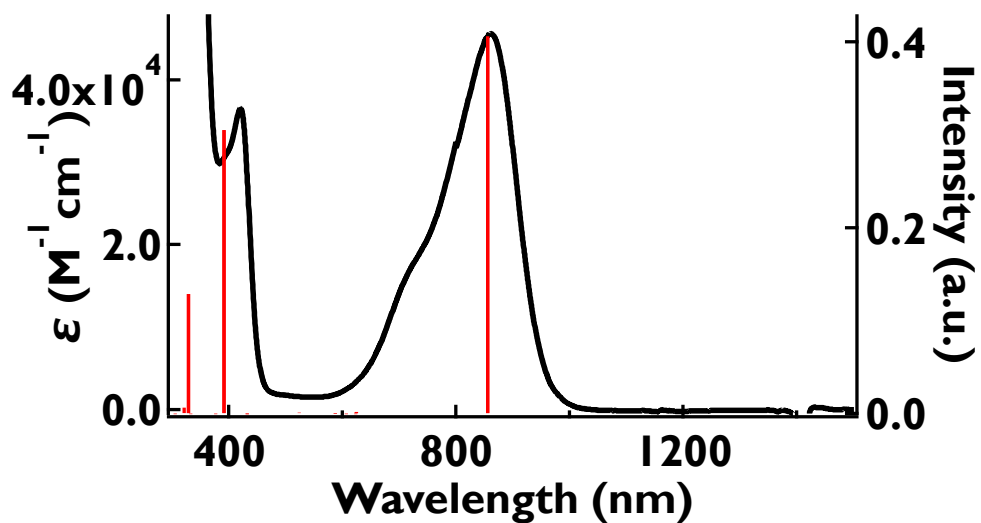

**Figure S18.** Experimental UV-vis absorption spectra of **2** after oxidation with ten equivalents of  $\text{SbCl}_5$  and TD-DFT calculated energy transition with oscillator strength shown as a vertical red line. See also Figure S3.

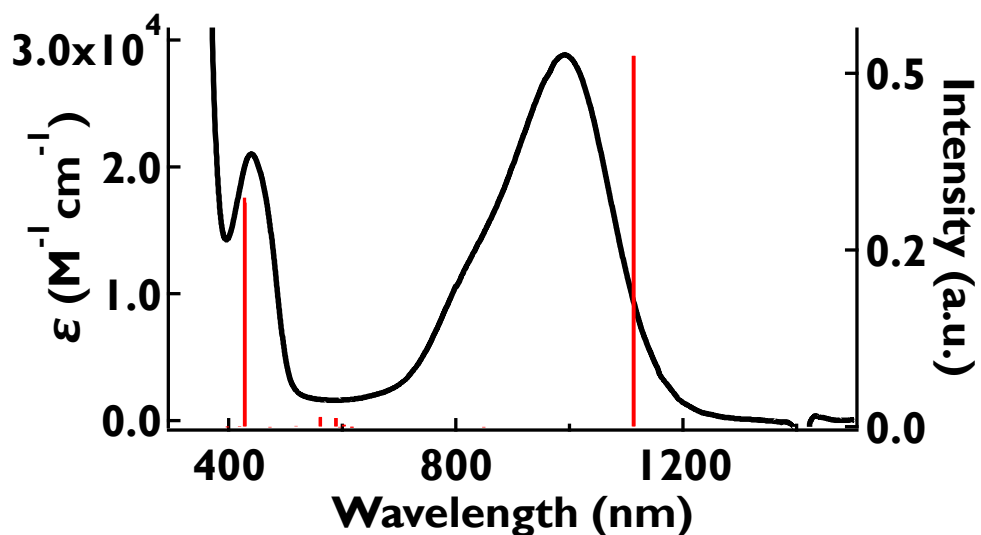

**Figure S19.** Experimental UV-vis absorption spectra of **3** after oxidation with ten equivalents of  $\text{SbCl}_5$  and TD-DFT calculated energy transition with oscillator strength shown as a vertical red line. See also Figure S3.



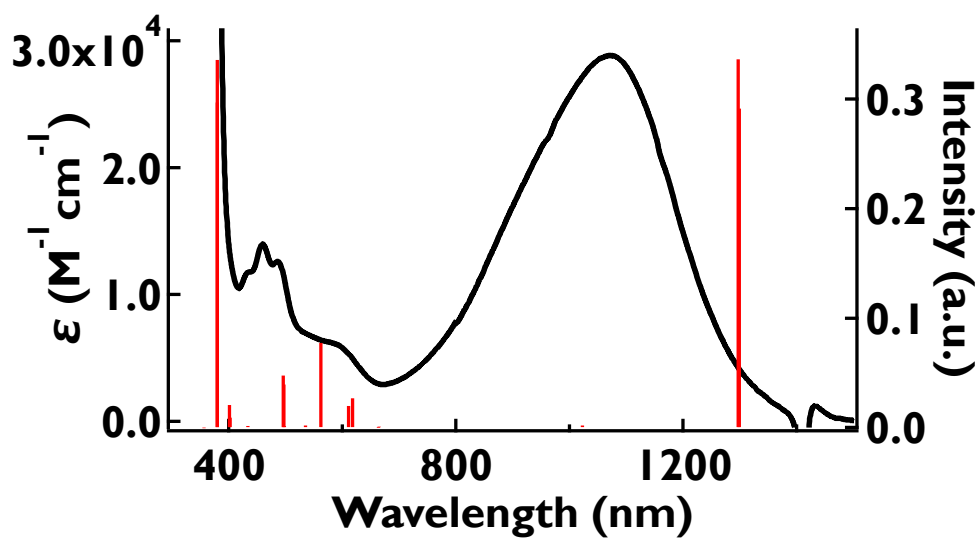

**Figure S20.** Experimental UV-vis absorption spectra of **4** after oxidation with ten equivalents of  $\text{SbCl}_5$  and TD-DFT calculated energy transition with oscillator strength shown as a vertical red line. See also Figure S4.

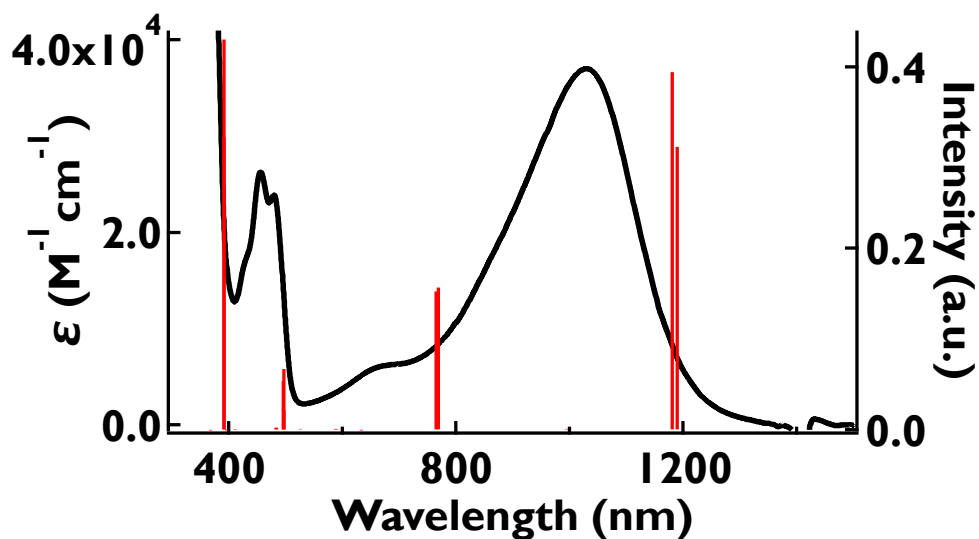

**Figure S21.** Experimental UV-vis absorption spectra of **5** after oxidation with ten equivalents of  $\text{SbCl}_5$  and TD-DFT calculated energy transition with oscillator strength shown as a vertical red line. See also Figure S4.

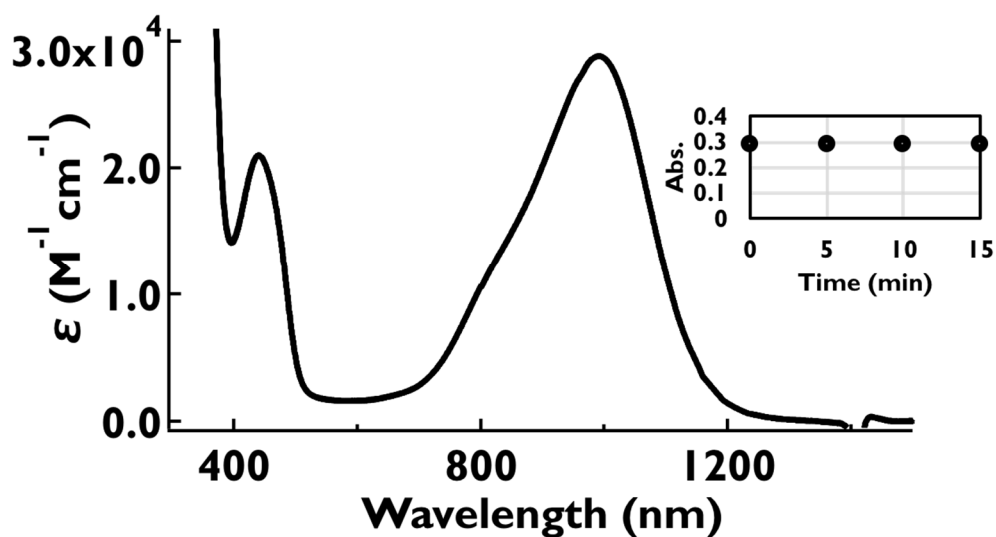

**Figure S22.** Time course of UV-vis absorption spectra of **3** with ten equivalents of  $\text{SbCl}_5$  in dichloromethane at room temperature recorded every 5 minutes. The initial concentration of **3** is  $1 \times 10^{-5}$  M. Inset: time-course of the peak intensity at 991 nm.

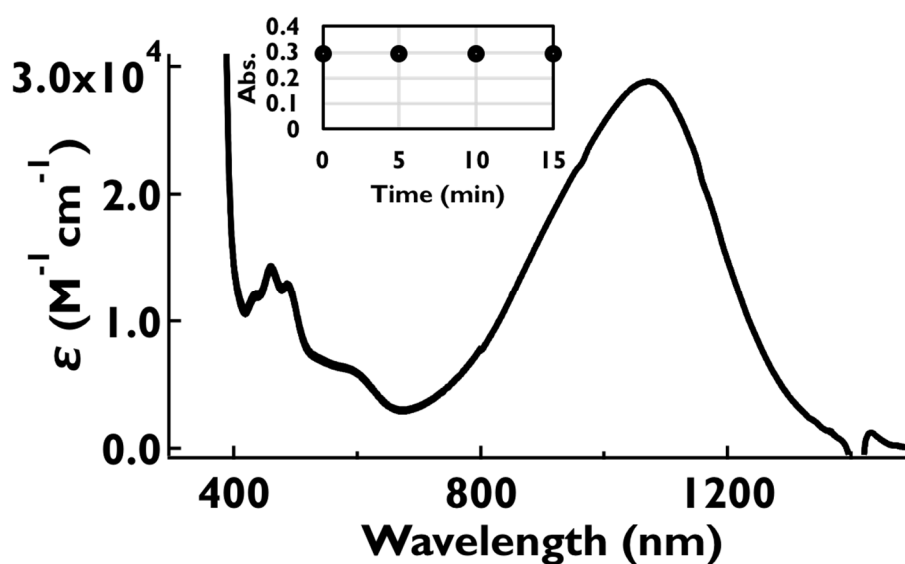

**Figure S23.** Time course of UV-vis absorption spectra of **4** with ten equivalents of  $\text{SbCl}_5$  in dichloromethane at room temperature recorded every 5 minutes. The initial concentration of **4** is  $1 \times 10^{-5}$  M. Inset: time-course of the peak intensity at 1071 nm.

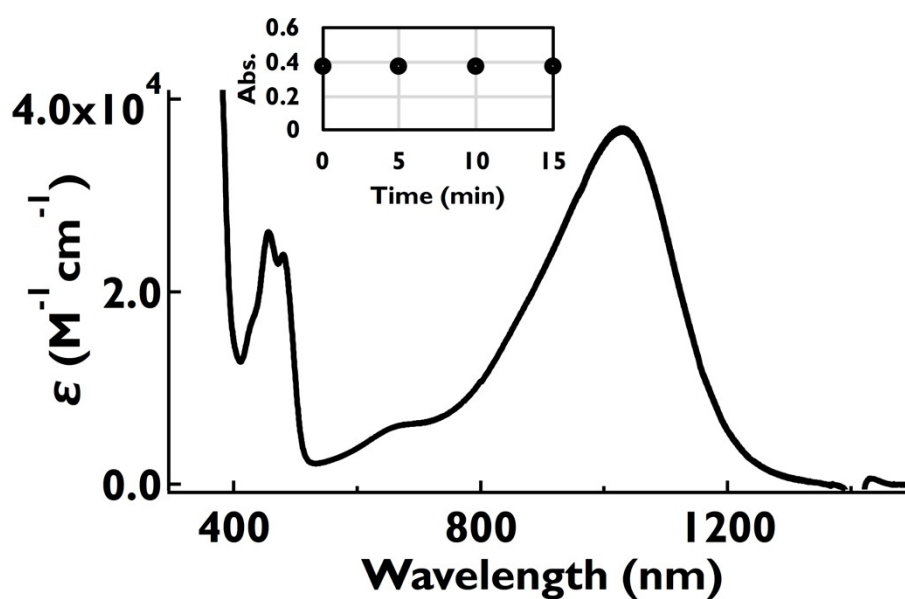

**Figure S24.** Time course of UV-vis absorption spectra of **5** with ten equivalents of  $\text{SbCl}_5$  in dichloromethane at room temperature recorded every 5 minutes. The initial concentration of **5** is  $1 \times 10^{-5}$  M. Inset: time-course of the peak intensity at 1028 nm.

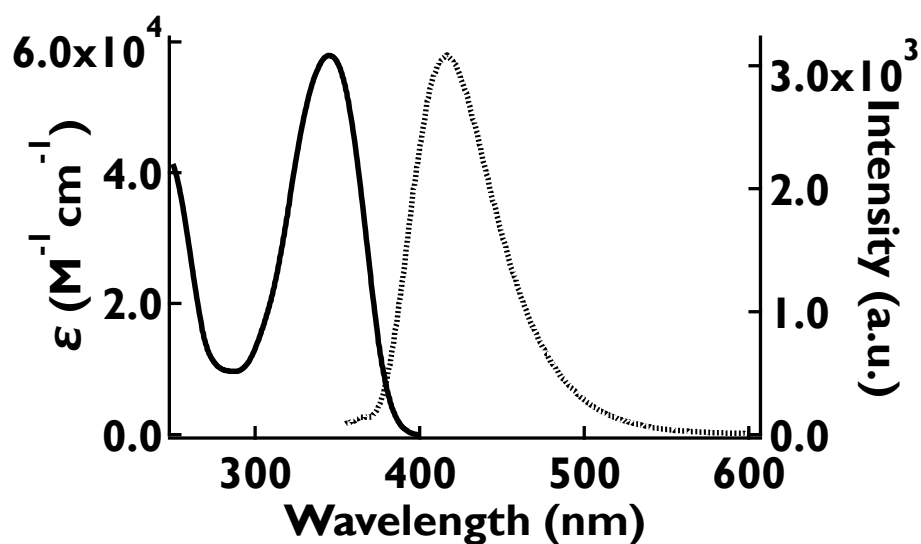

**Figure S25.** UV-vis (solid line) and fluorescence (dotted line) spectra of **2** in dichloromethane. The concentration is  $1 \times 10^{-5}$  M for UV-vis and  $1 \times 10^{-6}$  M for fluorescence spectra.

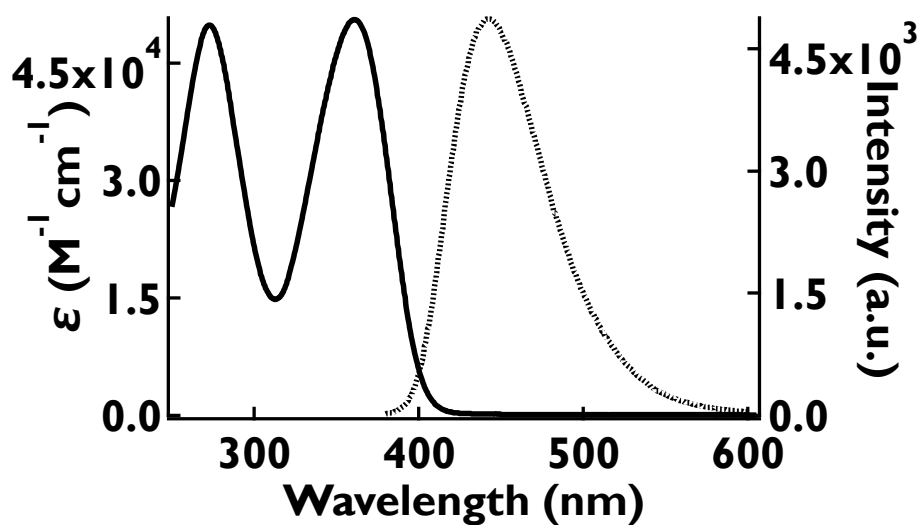

**Figure S26.** UV-vis (solid line) and fluorescence emission (dotted line) spectra of **3** in dichloromethane. The concentration is  $1 \times 10^{-5}$  M for UV-vis and  $1 \times 10^{-6}$  M for fluorescence spectrum.

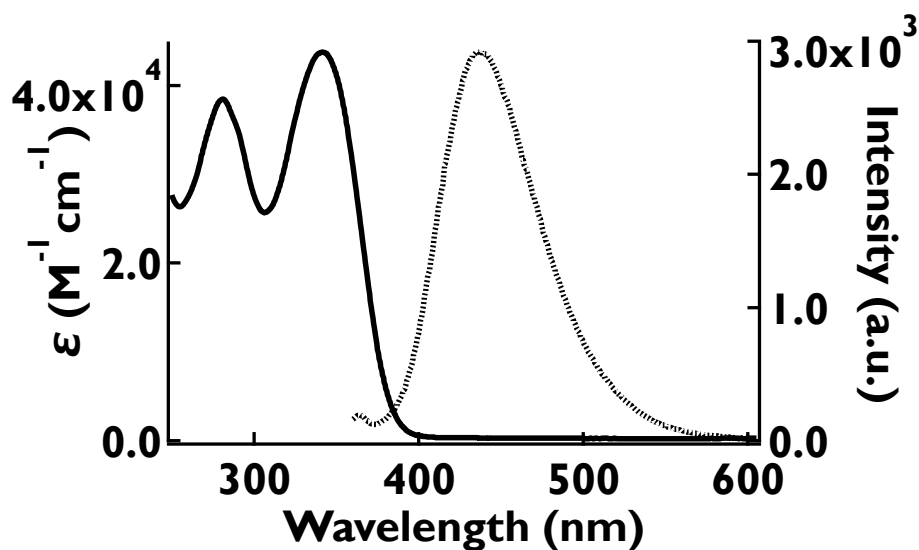

**Figure S27.** UV-vis (solid line) and fluorescence emission (dotted line) spectra of **4** in dichloromethane. The concentration is  $1 \times 10^{-5}$  M for UV-vis and  $1 \times 10^{-6}$  M for fluorescence spectrum.

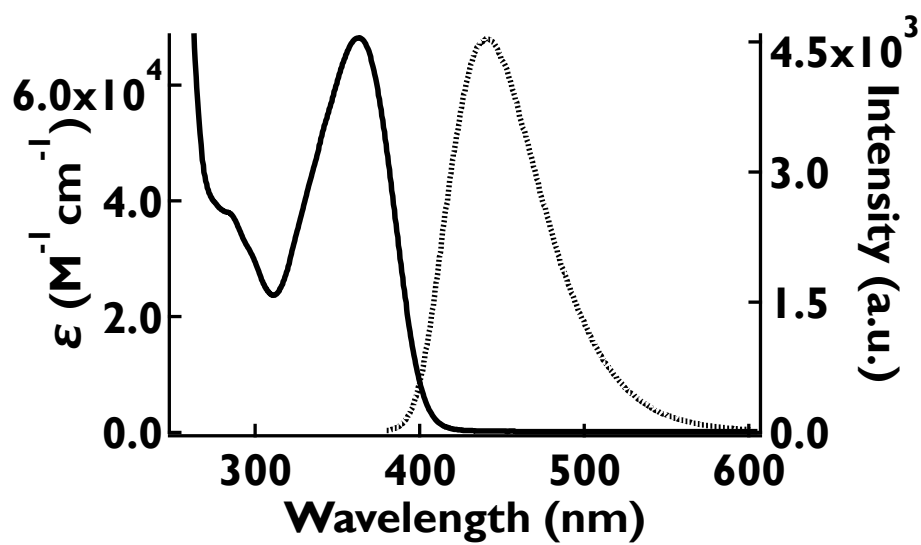

**Figure S28.** UV-vis (solid line) and fluorescence emission (dotted line) spectra of **5** in dichloromethane. The concentration is  $1 \times 10^{-5}$  M for UV-vis and  $1 \times 10^{-6}$  M for fluorescence spectrum.

## 7. Reduction of the radical cation 4<sup>•+</sup> with ascorbic acid.

To the solution of **4** (34.8 mg,  $5.56 \times 10^{-2}$  mmol) in dichloromethane (20 mL), 10 eq. of SbCl<sub>5</sub> in dichloromethane was slowly dropped at room temperature under nitrogen atmosphere. The solution was stirred for 5 min. The obtained solution was mixed with aqueous ascorbic acid solution, extracted with ethyl acetate, dried over sodium sulfate, and evaporated under reduced pressure to give white powder (34.4 mg).

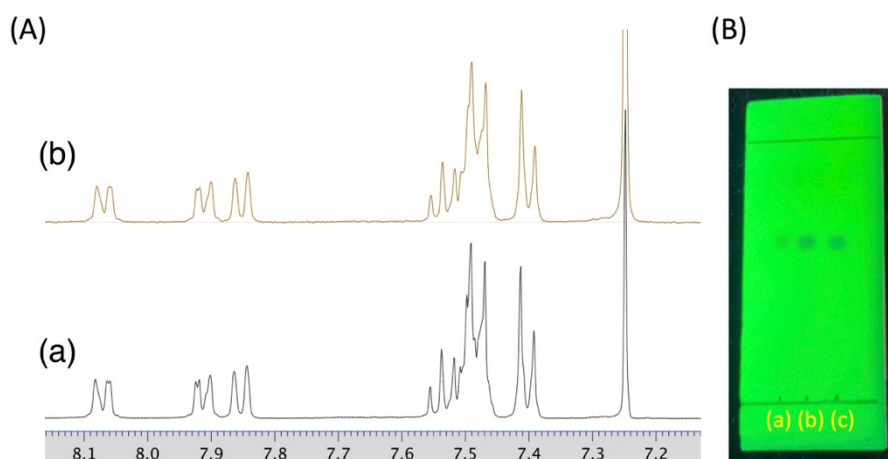

**Figure S29.** (A) <sup>1</sup>H NMR spectra of (a) **4** and (b) the resulting mixture after treatment of **4** with SbCl<sub>5</sub>, followed by reduction with excess ascorbic acid. (B) TLC plate of (a) **4**, (b) overstrike of **4** and the mixture obtained after oxidation of **4** followed by reduction and (c) the mixture obtained after oxidation of **4** followed by reduction (irradiation at 365 nm with a 4W UV lamp).

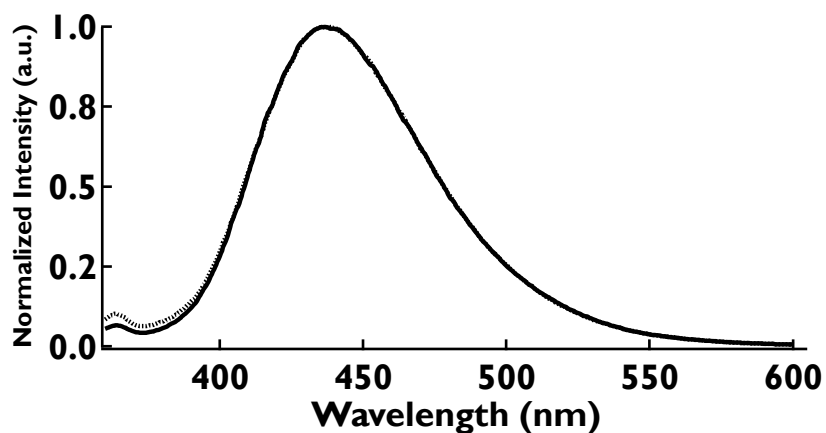

**Figure S30.** Normalized fluorescence spectra of **4** (solid line), and after addition of ten equivalents of SbCl<sub>5</sub> followed by reduction with excess ascorbic acid (dotted line).

## 8. Fluorescence spectra

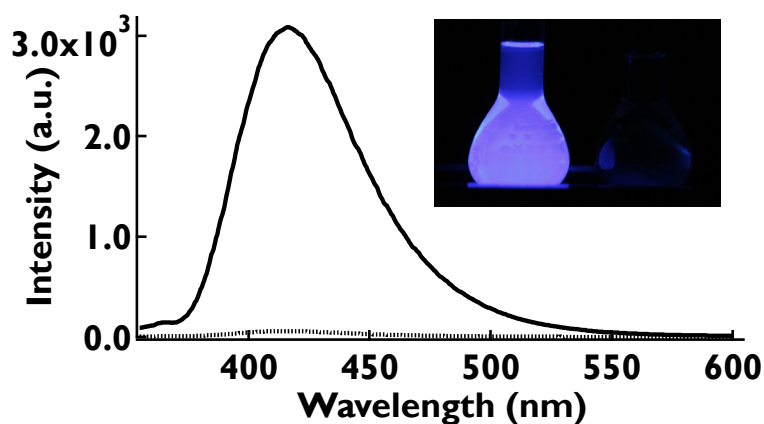

**Figure S31.** Fluorescence spectra of **2** before (solid line) and after oxidation with 10 equivalents of SbCl<sub>5</sub> (dotted line) in dichloromethane at room temperature. Excitation at 344 nm. [**2**] =  $1 \times 10^{-6}$  M. Inset: Luminescence arising from a dichloromethane solution of **2** in the absence (left) and presence of 10 equivalents of SbCl<sub>5</sub> (right), (irradiation with a 4W UV lamp). [**2**] =  $1 \times 10^{-5}$  M.

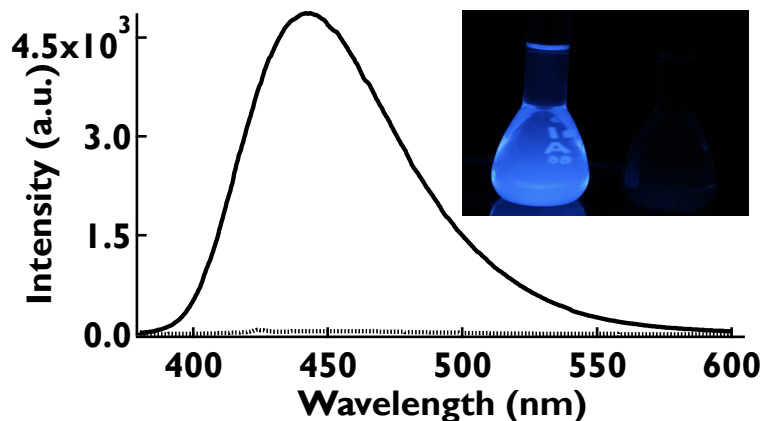

**Figure S32.** Fluorescence spectra of **3** before (solid line) and after oxidation with 10 equivalents of SbCl<sub>5</sub> (dotted line) in dichloromethane at room temperature. Excitation at 361 nm. [**3**] =  $1 \times 10^{-6}$  M. Inset: Luminescence arising from a dichloromethane solution of **3** in the absence (left) and presence of 10 equivalents of SbCl<sub>5</sub> (right), (irradiation with a 4W UV lamp). [**3**] =  $1 \times 10^{-5}$  M.

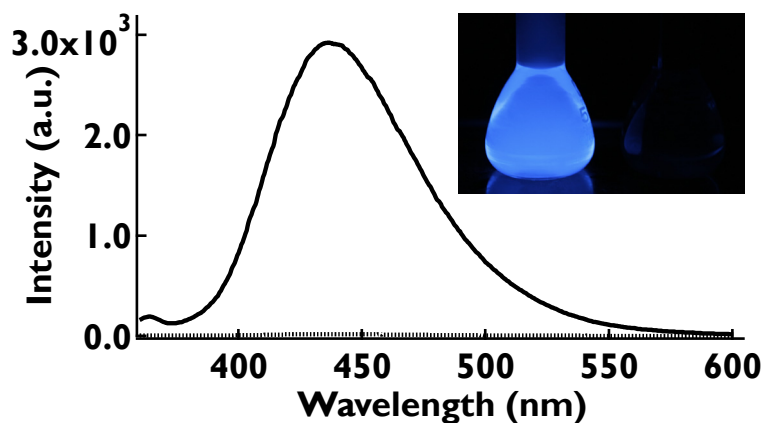

**Figure S33.** Fluorescence spectra of **4** before (solid line) and after oxidation with 10 equivalents of  $\text{SbCl}_5$  (dotted line) in dichloromethane at room temperature. Excitation at 341 nm.  $[\mathbf{4}] = 1 \times 10^{-6}$  M. Inset: Luminescence arising from a dichloromethane solution of **4** in the absence (left) and presence of 10 equivalents of  $\text{SbCl}_5$  (right), (irradiation with a 4W UV lamp).  $[\mathbf{4}] = 1 \times 10^{-5}$  M.

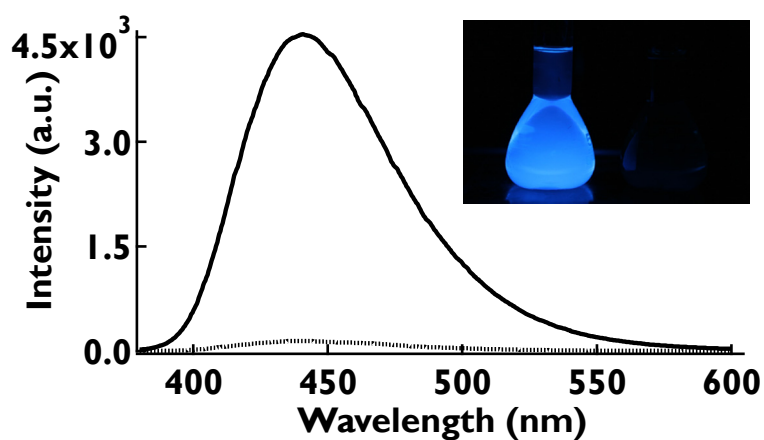

**Figure S34.** Fluorescence spectra of **5** before (solid line) and after oxidation with 10 equivalents of  $\text{SbCl}_5$  (dotted line) in dichloromethane at room temperature. Excitation at 363 nm.  $[\mathbf{5}] = 1 \times 10^{-6}$  M. Inset: Luminescence arising from a dichloromethane solution of **5** in the absence (left) and presence of 10 equivalents of  $\text{SbCl}_5$  (right), (irradiation with a 4W UV lamp).  $[\mathbf{5}] = 1 \times 10^{-5}$  M.



## 9. $^1\text{H}$ and $^{13}\text{C}$ spectra

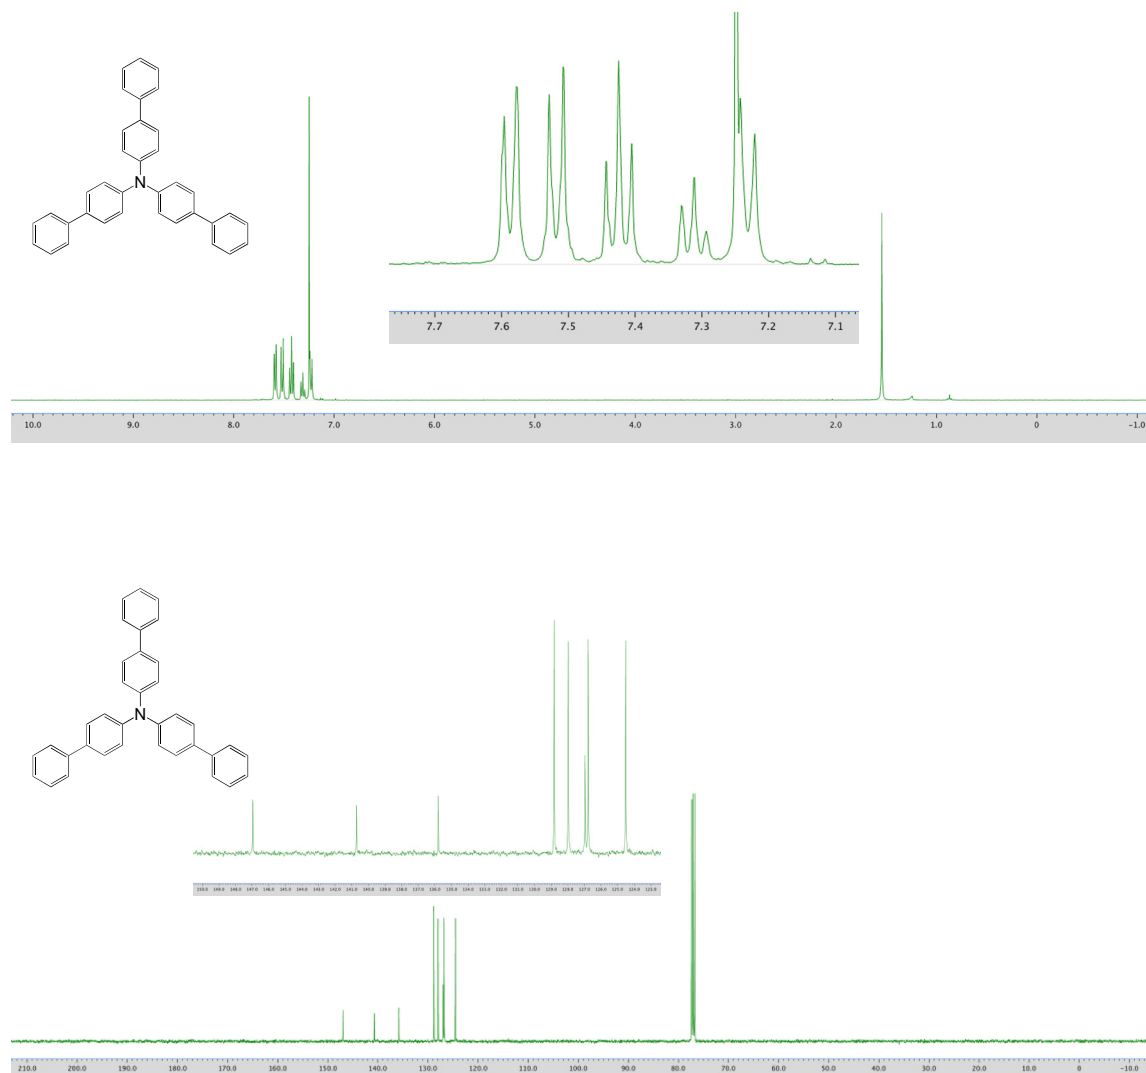

**Figure S35.**  $^1\text{H}$  and  $^{13}\text{C}$  spectra of **2**.

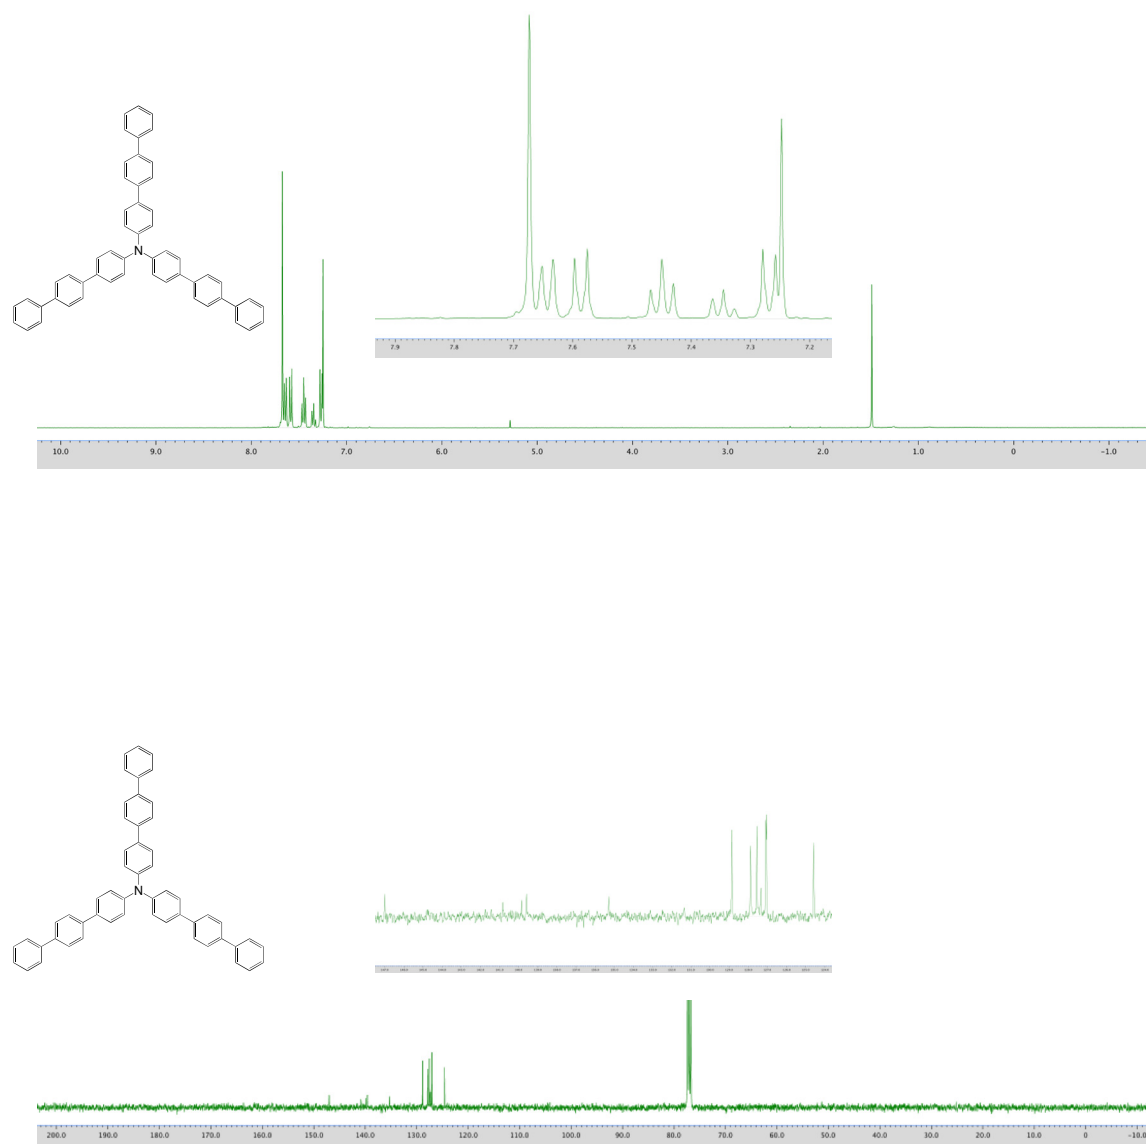

**Figure S36.**  $^1\text{H}$  and  $^{13}\text{C}$  spectra of **3**.

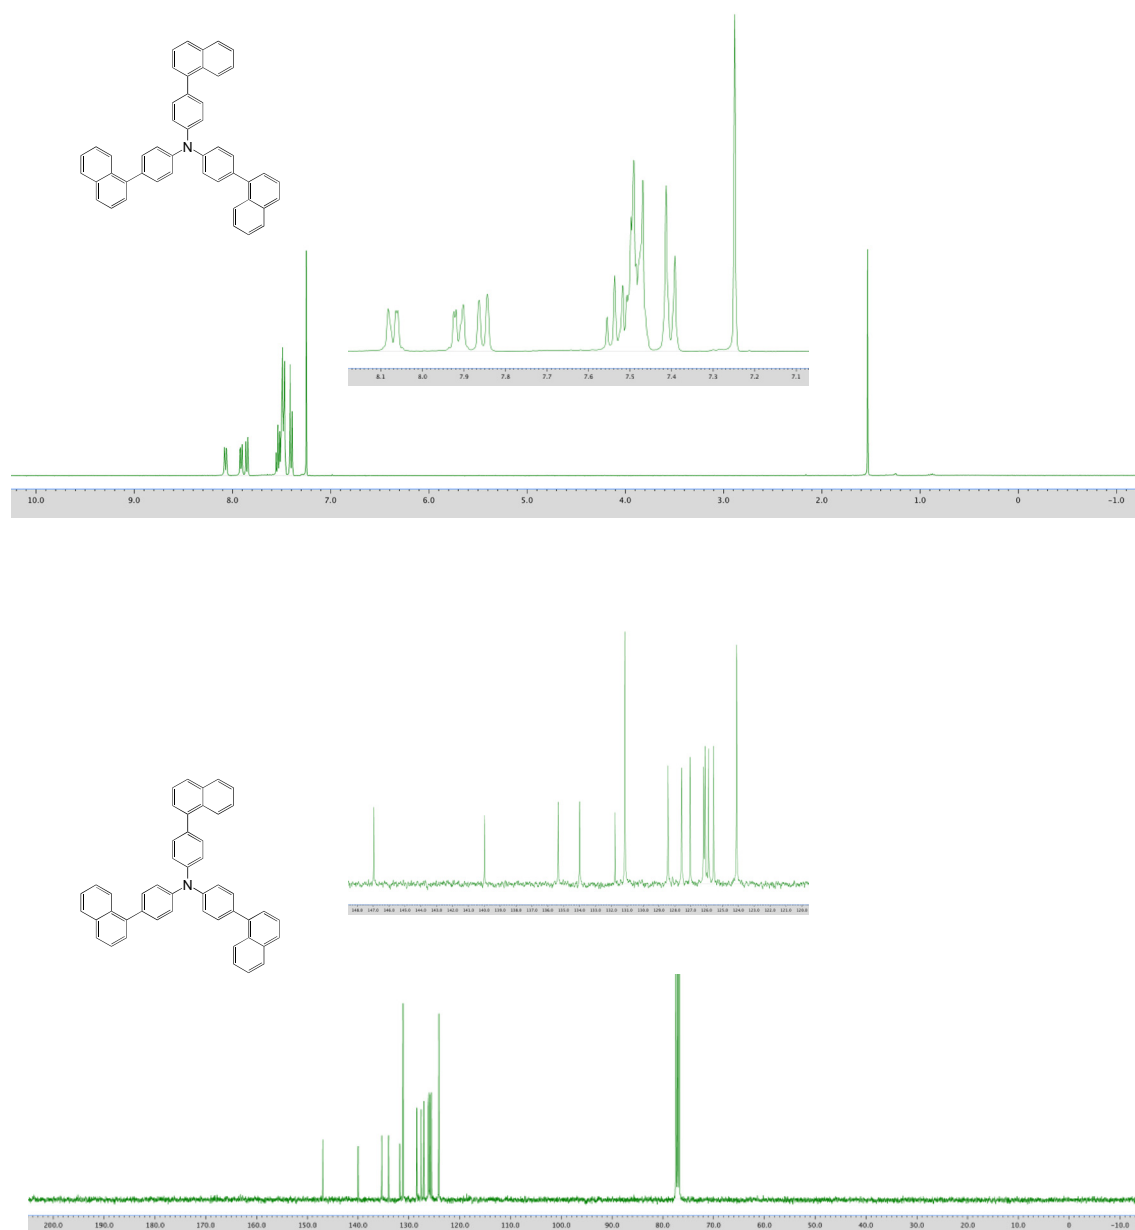

**Figure S37.**  $^1\text{H}$  and  $^{13}\text{C}$  spectra of **4**.

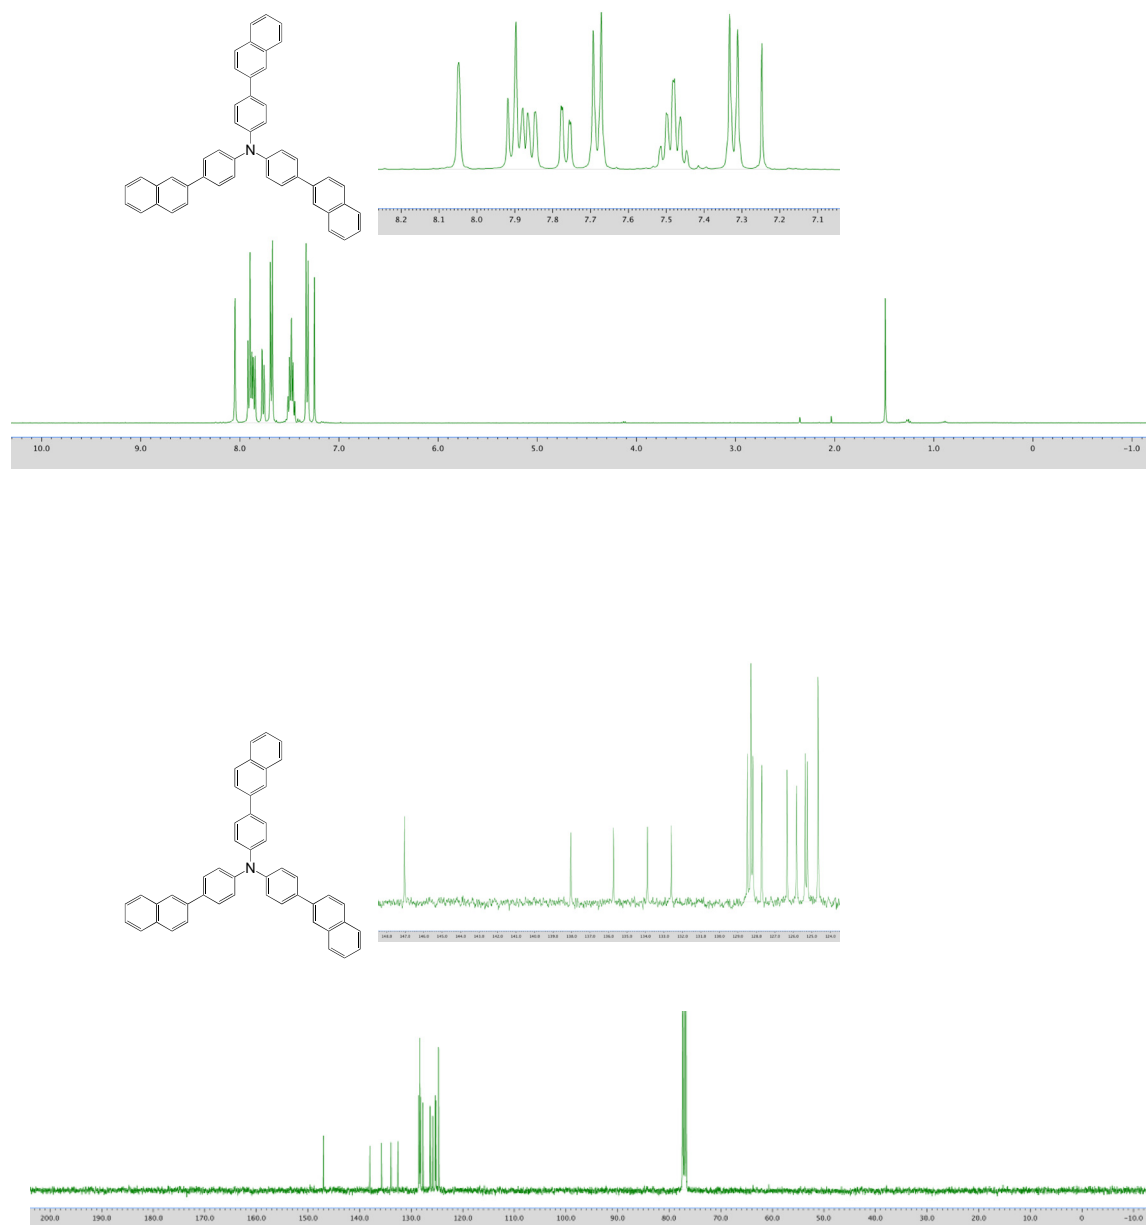

**Figure S38.**  $^1\text{H}$  and  $^{13}\text{C}$  spectra of **5**.

## 10. ESR spectra

Typical procedure for the preparation of radical cationic species for ESR measurements is as follows. To a solution of Ar<sub>3</sub>-TPA in dry dichloromethane ( $5.0 \times 10^{-4}$  M, 100 $\mu$ L) was added a solution of SbCl<sub>5</sub> in dry dichloromethane ( $5.0 \times 10^{-3}$  M, 100 $\mu$ L). The obtained solution was diluted to 5 mL with dry dichloromethane.

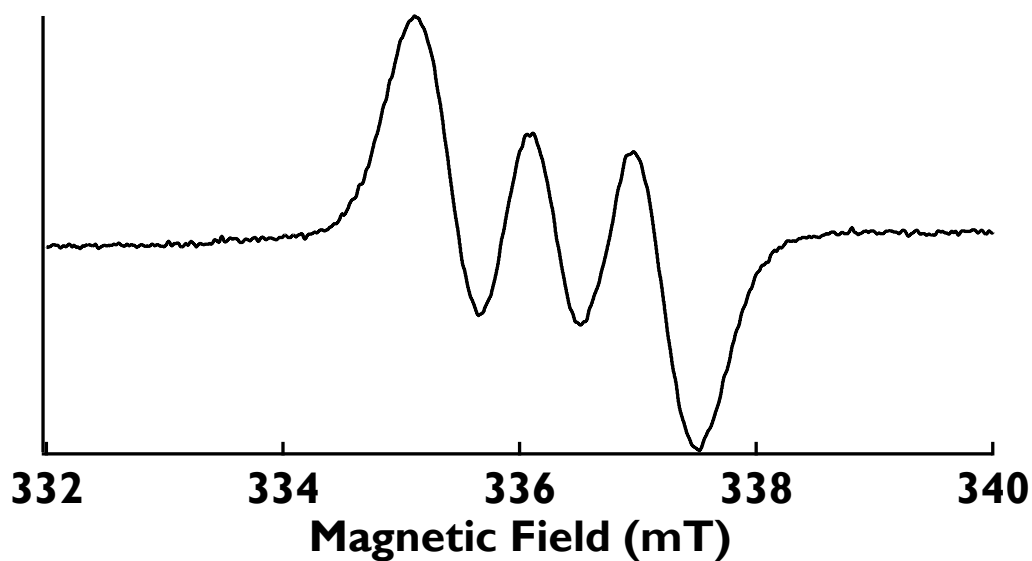

*Figure S39.* ESR spectrum of 2<sup>•+</sup> in CH<sub>2</sub>Cl<sub>2</sub>.

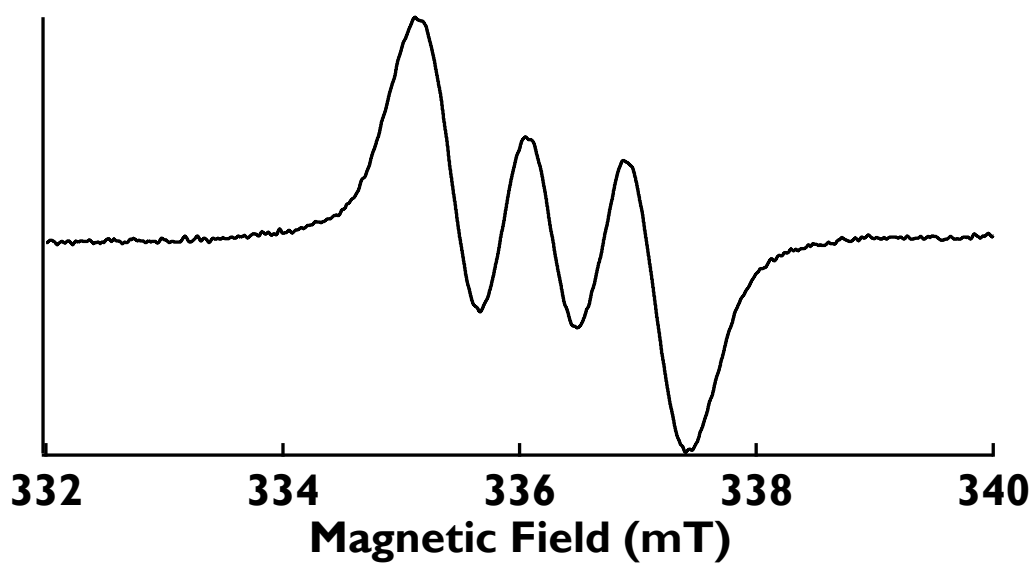

*Figure S40.* ESR spectrum of 3<sup>•+</sup> in CH<sub>2</sub>Cl<sub>2</sub>.

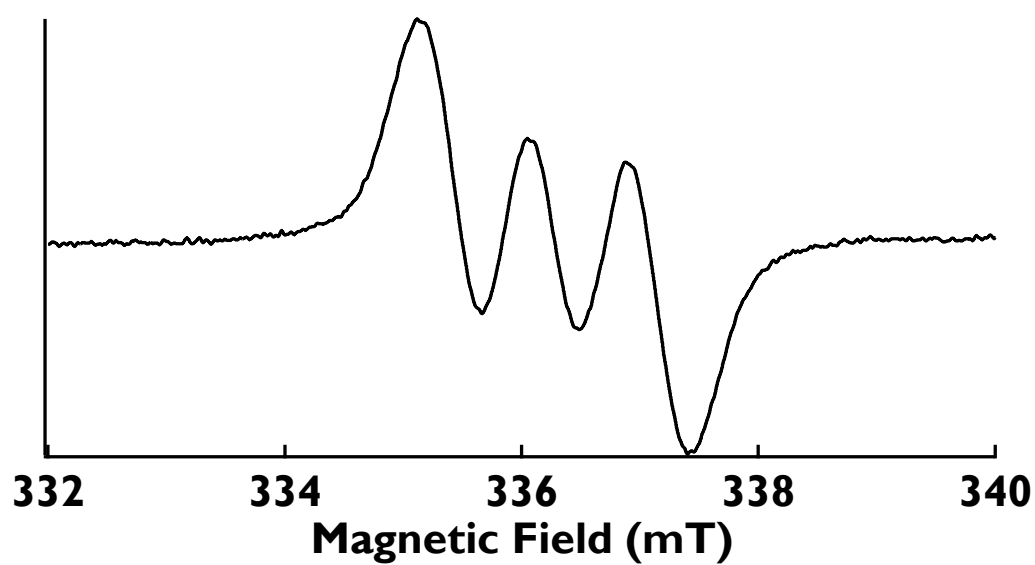

*Figure S41.* ESR spectrum of  $4^{\bullet+}$  in  $\text{CH}_2\text{Cl}_2$ .

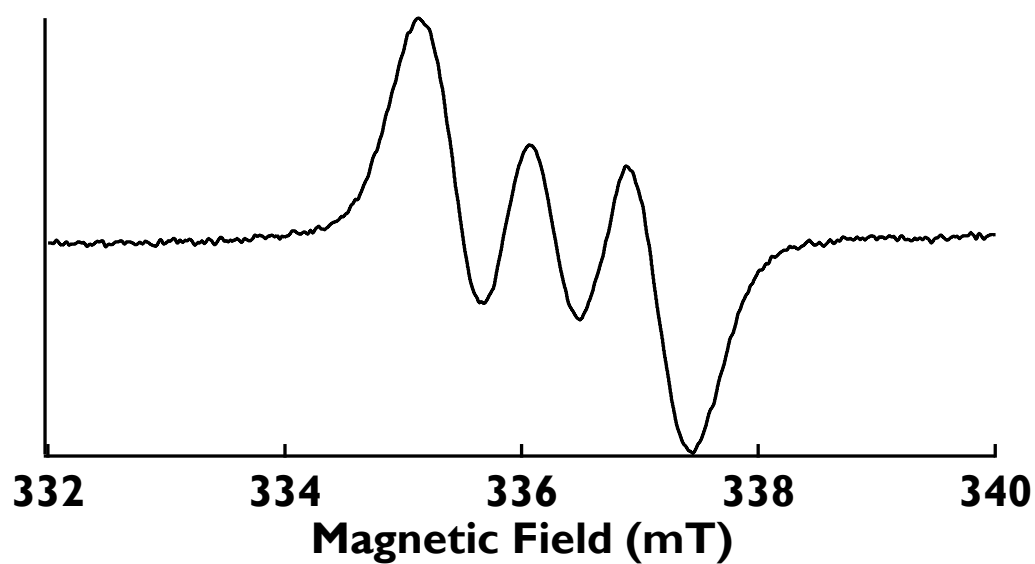

*Figure S42.* ESR spectrum of  $5^{\bullet+}$  in  $\text{CH}_2\text{Cl}_2$ .

## 11. References

1. Wang, K.; Deng, Z.H.; Xie, S.J.; Zhai, D.D.; Fang, H.Y.; Shi, Z.J. Synthesis of arylamines and N-heterocycles by direct catalytic nitrogenation using N<sub>2</sub>. *Nat. Commun.* **2021**, *12*, 248.
2. Kwon, J.; Kim, M.K.; Hong, J.-P.; Lee, W.; Noh, S.; Lee, C.; Lee, S.; Hong, J.-I. 4,4',4''-Tris(4-naphthalen-1-yl-phenyl)amine as a multifunctional material for organic light-emitting diodes, organic solar cells, and organic thin-film transistors. *Org. Electron.* **2010**, *11*, 1288–1295.
3. Kwon, J.; Kim, M.K.; Hong, J.-P.; Lee, W.; Lee, S.; Hong, J.-I. A multifunctional material based on triphenylamine and a naphthyl unit for organic light-emitting diodes, organic solar cells, and organic thin-film transistors. *Bull. Korean Chem. Soc.* **2013**, *34*, 1355–1360.
4. Frisch, M.J.; Trucks, G.W.; Schlegel, H.B.; Scuseria, G.E.; Robb, M.A.; Cheeseman, J.R.; Scalmani, G.; Barone, V.; Mennucci, B.; Petersson, G.A.; et al. *Gaussian 09, Revision E.01*; Gaussian, Inc.: Wallingford, CT, USA, 2009.
5. Becke, A. D. Density-functional thermochemistry. III. The role of exact exchange. *J. Chem. Phys.* **1993**, *98*, 5648–5652.
6. Lee, C.; Yang, W.; Parr, R. G. Development of the Colle-Salvetti correlation-energy formula into a functional of the electron density. *Phys. Rev. B* **1988**, *37*, 785–789.
7. Becke, A.D. A new mixing of Hartree–Fock and local density-functional theories. *J. Chem. Phys.* **1993**, *98*, 1372–1380.
8. Stephens, P.J.; Devlin, F.J.; Chabalowski, C.F.; Frisch, M. J. Ab Initio Calculation of Vibrational Absorption and Circular Dichroism Spectra Using Density Functional Force Fields. *J. Phys. Chem.* **1994**, *98*, 11623–11627.
9. Tomasi, J.; Mennucci, B.; Cammi, R. Quantum Mechanical Continuum Solvation Models. *Chem. Rev.* **2005**, *105*, 2999–3093.
